## 1 **Gulf of Mexico blue hole harbors high levels of novel microbial lineages**

2  
3 Patin NV<sup>1,2\*</sup>, Dietrich ZA<sup>3</sup>, Stancil A<sup>4</sup>, Quinan M<sup>4</sup>, Beckler JS<sup>4</sup>, Hall ER<sup>5</sup>, Culter J<sup>5</sup>, Smith  
4 CG<sup>6</sup>, Taillefert M<sup>7</sup>, Stewart FJ<sup>1,2,8</sup>

5  
6 1. School of Biological Sciences, Georgia Institute of Technology, Atlanta GA 30332

7 2. Center for Microbial Dynamics and Infection, Georgia Institute of Technology, Atlanta  
8 GA 30332

9 3. Bowdoin College, Brunswick ME 04011

10 4. Harbor Branch Oceanographic Institute, Florida Atlantic University, Ft. Pierce FL  
11 34946

12 5. Mote Marine Laboratory, Sarasota FL 34236

13 6. St. Petersburg Coastal and Marine Science Center, United States Geological Survey,  
14 St. Petersburg FL 33701

15 7. School of Earth & Atmospheric Sciences, Georgia Institute of Technology, Atlanta GA  
16 30332

17 8. Department of Microbiology & Immunology, Montana State University, Bozeman MT  
18 59717

19

20 \* Corresponding author: [nastassia.patin@biology.gatech.edu](mailto:nastassia.patin@biology.gatech.edu)

21

### 22 **Abstract**

23

24 Exploration of oxygen-depleted marine environments has consistently revealed novel  
25 microbial taxa and metabolic capabilities that expand our understanding of microbial  
26 evolution and ecology. Marine blue holes are shallow karst formations characterized by  
27 low oxygen and high organic matter content. They are logistically challenging to sample,  
28 and thus our understanding of their biogeochemistry and microbial ecology is limited.  
29 We present a metagenomic characterization of Amberjack Hole on the Florida  
30 continental shelf (Gulf of Mexico). Dissolved oxygen became depleted at the hole's rim  
31 (32 m water depth), remained low but detectable in an intermediate hypoxic zone (40-75  
32 m), and then increased to a secondary peak before falling below detection in the bottom  
33 layer (80-110 m), concomitant with increases in nutrients, dissolved iron, and a series of  
34 sequentially more reduced sulfur species. Microbial communities in the bottom layer  
35 contained heretofore undocumented levels of the recently discovered phylum  
36 Woesearchaeota (up to 58% of the community), along with lineages in the bacterial  
37 Candidate Phyla Radiation (CPR). Thirty-one high-quality metagenome-assembled  
38 genomes (MAGs) showed extensive biochemical capabilities for sulfur and nitrogen  
39 cycling, as well as for resisting and respiring arsenic. One uncharacterized gene  
40 associated with a CPR lineage differentiated hypoxic from anoxic zone communities.

41 Overall, microbial communities and geochemical profiles were stable across two  
42 sampling dates in the spring and fall of 2019. The blue hole habitat is a natural marine  
43 laboratory that provides opportunities for sampling taxa with under-characterized but  
44 potentially important roles in redox-stratified microbial processes.

45

## 46 **Introduction**

47

48 Blue holes are subsurface caverns found in karst bedrock environments. They formed  
49 during climatic periods when low sea levels exposed the bedrock to weathering, and  
50 subsequently became submerged as sea levels rose (1). Marine blue holes differ from  
51 anchialine blue holes, such as those found in the Bahamas and the Yucatán peninsula,  
52 as they do not have freshwater layers and are not exposed to the atmosphere.  
53 Anchialine blue holes can be highly stratified, with anoxic and sulfidic bottom waters (2–  
54 4) and microbial communities distinct from other marine and freshwater systems (5–8).  
55 However, data on true marine blue holes are limited. A recent study on the Yongle Blue  
56 Hole, the deepest known marine blue hole with a bottom depth of 300 m, found the  
57 water column became anoxic around 100 m with increases in hydrogen sulfide,  
58 methane, and dissolved inorganic carbon below that depth (9). This and two additional  
59 studies also found that microbial communities in the Yongle Blue Hole were notably  
60 different from those of the surrounding pelagic water column, with anoxic layers in the  
61 hole dominated by taxa linked to sulfur oxidation and nitrate reduction (9–11). Further,  
62 deep blue hole waters may be resistant to mixing with waters outside the hole,  
63 especially in regions with limited seasonal variation or water mass intrusion. These  
64 observations suggest the potential for blue holes to harbor novel microbial lineages as a  
65 consequence of both unique geochemistry and environmental isolation.

66

67 Locations of 18 blue holes have been recorded in offshore waters on the west Florida  
68 shelf; however, many more may exist but remain undiscovered due to a lack of  
69 systematic survey ((12); J. Culter, unpublished data). According to anecdotal reports  
70 from recreational divers and fishers, the rims of these holes feature dense communities  
71 of corals, sponges, and other invertebrates, in contrast with the more barren sandy  
72 bottom of the surrounding shelf. Commercially and recreationally valuable fishes also  
73 congregate at the rims. The presence of high biomass has led to speculation that blue  
74 holes could represent offshore sources of groundwater-derived nutrients transported via  
75 extensions of the Floridan aquifer (13). However, unlike for some of the nearshore blue  
76 holes (12), no measurements of groundwater discharge have been made in the offshore  
77 blue holes. Elevated nutrient levels at these sites have broad relevance for coastal  
78 ecology in the Gulf of Mexico, particularly as they may fuel phytoplankton blooms  
79 (14,15). Indeed, the west coast of Florida experiences frequent and intense harmful  
80 algal blooms (HABs). While numerous nutrient sources have been identified as potential

81 HAB triggers, the relative importance of these sources remains geographically  
82 unconstrained and our knowledge of what drives HABs is by no means complete (16–  
83 18).

84  
85 Gulf of Mexico blue holes may be chemically stratified and devoid of oxygen. In one of  
86 the only biological studies of these features, Garman et al. (2011) explored Jewfish  
87 Sink, a coastal blue hole near Hudson, Florida. Oxygen concentrations fell from near  
88 saturation at the rim (~2 m water depth) to zero around 20 m water depth and remained  
89 below detection all the way to the bottom of the hole (~64 m water depth), with the  
90 anoxic layer further characterized by pronounced sulfide accumulation with depth. A  
91 clone library of 16S rRNA genes from microbial mats in the hole revealed a  
92 taxonomically rich community (338 operational taxonomic units, including 150 bacterial  
93 and 188 archaeal taxa), with sequences closely related to those from low-oxygen  
94 habitats including deep-sea sediments, salt marshes, cold seeps, and whale falls (6).  
95 These sequences represent taxa linked to a range of metabolisms, including  
96 dissimilatory sulfur, methane, and nitrogen cycling (both oxidative and reductive). This  
97 study also reported dense and chemically variable clouds of particulates within the hole;  
98 these included iron-sulfide minerals, suggesting the potential for microbial-metal  
99 interactions in the water column.

100  
101 This work, alongside evidence from the South China Sea sites (9), suggests marine  
102 blue holes are biogeochemically complex features and potential hotspots for microbial  
103 diversity. Indeed, oxygen-depleted marine water columns have been rich targets for  
104 exploring novel microbial processes. Within the past five years alone, studies in these  
105 systems have shed new light on microbial processes of arsenic respiration (19), cryptic  
106 sulfur (20) and oxygen cycling (21), low-oxygen adapted nitrification (22) and  
107 denitrification (23), and anaerobic methane oxidation (24). Moreover, oxygen-depleted  
108 waters are expanding worldwide (25), making it critical to understand how oxygen  
109 concentration impacts microbially regulated nutrient and energy budgets, and how these  
110 impacts vary among sites. Most microbes in these systems are uncultivated and  
111 phylogenetically divergent from better-studied relatives. Many of these taxa remain  
112 unclassified beyond the phylum or class level and likely represent lineages uniquely  
113 adapted to low-oxygen conditions. In lieu of cultivation, metagenomic analysis enables  
114 exploration of both the taxonomy and function of microbial players in blue holes and  
115 similar low-oxygen environments.

116  
117 Here, we used metagenomics to describe the microbial ecosystem in a marine blue hole  
118 on the west Florida shelf. To help interpret microbial processes, we also present a  
119 comprehensive electrochemistry-based analysis of redox chemical speciation.  
120 Amberjack (AJ) Hole lies ~50 km west of Sarasota, Florida at a water depth of 32 m.

121 Like Jewfish Sink, AJ is conical in shape, with a narrow rim (25 m diameter) and a wider  
122 floor (approximately 100 m diameter; Curt Bowen, personal communication). Water  
123 depth at the floor ranges from 110 m at the edge to 90 m at the center, where a debris  
124 pile of fine-grained sediment has accumulated. Our knowledge of AJ, like that of other  
125 marine blue holes, is limited and based primarily on exploration by a small number of  
126 technical divers. The hole's shape and depth present a challenge for SCUBA, as well as  
127 for instrumentation or submersibles. During two expeditions in May and September  
128 2019, we used a combination of technical divers and Niskin bottles to sample water  
129 column microbial communities. These collections spanned oxygenated waters at the  
130 rim, an anoxic but non-sulfidic intermediate layer, and a bottom layer rich in reduced  
131 sulfur compounds. Our results reveal a system that is highly stratified, apparently stable  
132 between timepoints, and phylogenetically diverse, with high representation by  
133 uncultivated and poorly understood taxa. The results suggest marine blue holes may  
134 serve as unique natural laboratories for exploring redox-stratified microbial ecosystems,  
135 while highlighting a need for future biogeochemical exploration of other blue holes and  
136 similar habitats.

137

## 138 **Results**

139

### 140 *Sampling scheme*

141

142 We sampled physical, chemical, and biological features of Amberjack Hole in May and  
143 September 2019. The May data set included one conductivity, temperature, and depth  
144 (CTD) profile with a coupled dissolved oxygen sensor, along with water column samples  
145 for chemical analyses (5 depths) and microbial community sequencing (11 depths,  
146 including 5 from within the hole). These samples were collected via a combination of  
147 diver bottle water exchange, hand-cast Niskin bottles, and automated Niskin sampling  
148 on a rosette (Table S1). The CTD profile was acquired by attaching a combined CTD  
149 and optical dissolved oxygen sensor to an autonomous lander deployed for 24 hours to  
150 measure sediment respiratory processes and fluxes (data not included in this study).  
151 The lander was positioned at 106 m water depth on the slope of the debris pile; the  
152 deepest May water sample was acquired by a diver at this depth.

153

154 In September, improved sampling design resulted in higher spatial resolution for all  
155 water column parameters. We obtained two CTD profiles and eight samples from within  
156 the hole for microbiome analysis. All September water samples were acquired by hand-  
157 cast Niskin bottles, with the deepest sample from 95 m, the presumed peak of the  
158 debris pile. In contrast to the May sampling, all water sampling in September was  
159 performed on the day of the CTD casts, ensuring that chemical and biological

160 measurements were temporally coupled. We therefore focus primarily on September  
161 results (below), with exceptions where noted.

162

### 163 *Water column physical and chemical profiles*

164

165 Amberjack Hole was highly stratified (Fig. 1). Salinity increased sharply by one PSU  
166 between the overlying water column (35.2) and the blue hole water mass (~30 m, 36.2).  
167 Within the hole, salinity decreased slightly with depth (maximum difference 0.4 PSU)  
168 until 75 m and then increased to ~36 PSU at the bottom. Dissolved oxygen decreased  
169 sharply upon entry into the hole, from 100% saturation at the rim (32 m) to less than 5%  
170 saturation by 40 m (Fig. 1B). Oxygen then increased gradually to a secondary maximum  
171 of 40% at 75 m, before dropping to near 0% (anoxia) below 80 m.

172

173 Dissolved inorganic nitrogen (nitrate ( $\text{NO}_3^-$ ) + nitrite ( $\text{NO}_2^-$ ), or  $\text{NO}_x$ ) spiked between 40  
174 and 70 m from 0 to ~12  $\mu\text{M}$  in May and nearly 17  $\mu\text{M}$  in September, while ammonium  
175 ( $\text{NH}_4^+$ ) and phosphate ( $\text{PO}_4^{3-}$ ) increased sharply below 80 m (Fig. 1C). Bottom water  
176 nutrient concentrations were higher in September than in May, with  $\text{NH}_4^+$  reaching  
177 nearly 50  $\mu\text{M}$  and  $\text{PO}_4^{3-}$  exceeding 8  $\mu\text{M}$ . Particulate nutrients (N, P, and carbon (C))  
178 and chlorophyll *a* concentrations were seemingly less variable throughout the water  
179 column in May compared to September (Fig. S2), although this pattern may be an  
180 artifact of the lower sampling resolution. In September, particulate nutrients and  
181 chlorophyll *a* spiked at the hole opening (between 30 and 40 m) with P at 0.1  $\mu\text{M}$ , N at  
182 1.2  $\mu\text{M}$ , C at 11  $\mu\text{M}$ , and chlorophyll *a* at nearly 1.5  $\mu\text{g/L}$ . Particulate nutrients remained  
183 low deeper in the water column with the exception of P, which spiked again to 0.14  $\mu\text{M}$   
184 at 80 m. Particulate C and N also increased slightly below 80 m (Fig. S2).

185

186 Coinciding with anoxia, ferrous iron ( $\text{Fe(II)}_d$ ) increased from 16  $\mu\text{M}$  to 187  $\mu\text{M}$  between  
187 70 and 80 m, respectively. With increasing depth, sequentially more reduced sulfur  
188 compounds were observed (Fig. 1D):

189 a) at 85 m,  $\text{S}_2\text{O}_3^{2-}$  (thiosulfate, sulfur (S) in the +II oxidation state), reached a  
190 maximum of 264  $\mu\text{M}$ ;

191 b) at 90 m, S(0), representing either  $\text{S}_8$  (i.e. elemental sulfur, S in the 0 oxidation  
192 state) or most S within polysulfide ( $\text{S}_x^{2-}$ , e.g.  $\text{S}_4^{2-}$  or  $\text{S}_8^{2-}$ ), in filtered (< 0.7  $\mu\text{m}$ ) and  
193 unfiltered water reached 126  $\mu\text{M}$  and 599  $\mu\text{M}$ , respectively; and

194 c) at 95 m (deepest sample), combined  $\Sigma\text{S(-II)}$  (i.e. either as hydrogen sulfide ( $\text{HS}^-$ ),  
195 polysulfide ( $\text{S}_x^{2-}$ ), or both) reached a maximum of 61  $\mu\text{M}$ .

196 Due to analytical uncertainties associated with the voltammetric quantification scheme,  
197 the  $\Sigma\text{S(-II)}$  as presented may contribute redundantly to both (b) and (c) from a sulfur  
198 mass balance perspective. Only 6% of the S(-II) signal in the 95 m sample is lost upon  
199 filtering through 0.7  $\mu\text{m}$  GFF filters (not shown), compared to 93 -100% losses in the 85



200 and 80 m samples, respectively, suggesting that the deepest waters are probably  
201 enriched in true hydrogen sulfide ( $\text{HS}^-$ ). Indeed, significant  $\text{HS}^-$  is fluxing from sediments  
202 as revealed by benthic flux and pore water measurements (data not shown).

203  
204 Notably, the zone of  $\text{S}(0)$  (i.e. elemental sulfur) accumulation between 80 and 90 m was  
205 marked by a spike in turbidity (Fig. 1B). In addition, particulate P was elevated  
206 concomitantly with  $\text{Fe}_d$  and  $\text{Fe(II)}_d$  between 70 and 80 m (Fig. 1D and S2). The latter  
207 suggests the presence of particulate or colloidal minerals and associated adsorption  
208 sites (e.g., Fe oxide colloids).

209  
210 The May sampling resulted in a single data point from a depth of 85 m, which showed  
211 levels of  $19.8 \pm 2.3 \mu\text{M S}_2\text{O}_3^{2-}$ ,  $93 \mu\text{M } \Sigma\text{S(-II)}$ , and no  $\text{S}(0)$ , similar to the September  
212 measurements from that depth.

### 213 214 *Microbial community composition*

215  
216 16S rRNA gene amplicon sequencing yielded 12,692 to 118,397 reads per sample after  
217 filtering for quality (Table S1). Water column microbial communities differed significantly  
218 based on depth grouping (PERMANOVA  $p=0.016$ ), partitioning into shallow (0-32 m,  
219 oxic zone above the hole), middle (40-70 m, hypoxic zone), and deep (80-106 m, anoxic  
220 zone) groups (Fig. 2A). The shallow group was characterized by the ubiquitous  
221 cyanobacteria *Synechococcus* and *Prochlorococcus*, as well as several clades of the  
222 heterotrophic alphaproteobacterium SAR11 (particularly clade Ia) (Figure 2B).  
223 Cyanobacteria were absent below 32 m in both May and September. The middle water  
224 column featured high frequencies of *Nitrosopumilus* sp., a member of the ammonia-  
225 oxidizing Thaumarchaeota, as well as members of the sulfur-oxidizing family  
226 *Thioglobaceae* (Fig. 2B). Other groups, composing 1-10% of the community in this  
227 depth zone, included Marine Group II and III Thermoplasmata (formerly MGII/III  
228 Euryarchaeota) and members of the family *Gimesiaceae* (phylum Planctomycetes).

229  
230 The anoxic and sulfidic deep water column was dominated by Woesearchaeota of the  
231 DPANN superphylum. Woesearchaeota represented 33% - 56% of all sequences below  
232 75 m in both May and September and were comprised of 74 sequence variants (SVs),  
233 with two SVs representing between 84% (May 85 m) and 99% (September 90 m) of the  
234 total Woesearchaeotal fraction. Other well-represented groups included *Nitrosopumilus*  
235 sp, *Thioglobaceae* (SUP05 clade), and a member of the phylum Bacteroidota (formerly  
236 Bacteroidetes) associated with hydrothermal vents ("Bacteroidetes VC2.1 Bac22" in the  
237 SILVA database) (Fig. 2B). While Shannon diversity was similar among depth groups,  
238 Simpson diversity was ~50% higher in the deep compared to the middle and shallow  
239 groups (Fig. S3).

240  
241 Depth patterns in community composition were highly similar between May and  
242 September. The most abundant taxa showed only minor differences in frequency  
243 between these months, with a few exceptions (Fig. 3). Marine Group II  
244 Thermoplasmatota reached 12% relative abundance in the middle hypoxic zone in  
245 September while in May this taxon never exceeded 1%; in contrast, Marine Group III  
246 peaked at around 6% in May and in September only reached about half that level. In  
247 May, *Thioglobaceae* frequency increased steadily below 30 m to peak at >10% of the  
248 community in the deep anoxic zone. In contrast, *Thioglobaceae* was not detected in the  
249 anoxic zone in September. Rather, *Arcobacter* sp. (represented by a single SV) spiked  
250 at 80 m in September to nearly 10% of the community. In all other samples, this taxon  
251 never exceeded 0.5% at any sampled depth. The 80 m depth was not sampled in May.

### 252 253 *Metagenomes and MAG taxonomy*

254  
255 We obtained four metagenomes from two depths in both May and September. These  
256 represent communities at 60 m (both months) in the hypoxic (~15% O<sub>2</sub> saturation) and  
257 *Nitrosopumilus*-dominated zone, and at 106 m (May) and 95 m (September) in the  
258 anoxic, sulfidic, and Woesearchaeota-dominated zone. Sequencing and assembly  
259 results are provided in Table S2. Metagenome binning involving data from all samples  
260 yielded 31 high-quality, non-redundant MAGs representing a diverse array of microbial  
261 taxa (Table 1). These included eight archaeal MAGs, seven of which were generated  
262 from the 60 m samples, including six belonging to the phylum Thermoplasmatota and  
263 one belonging to *Nitrosopumilus* (Thaumarchaeota). The deep metagenomes yielded  
264 two MAGs classified as members of the superphylum Patescibacteria, part of the  
265 Candidate Phyla Radiation, one of which contained a 16S rRNA gene SV classified as  
266 *Ca. Uhrbacteria*. The only archaeal MAG from the deep samples was classified as a  
267 member of the order Woesearchaeota. This MAG contained a 16S rRNA gene with  
268 100% nucleotide identity to the most abundant SV recovered in amplicon sequencing of  
269 the bottom water communities (Table 1, Table S3). Queries against the Genome  
270 Taxonomy Database (GTDB; using MAG single-copy core genes) and SILVA database  
271 (using the 16S rRNA gene SV) classified this MAG as belonging to the order  
272 “Woesearchaeia” in the phylum Nanoarchaeota. However, this classification is outdated,  
273 as “Woesearchaeia” has recently been given the phylum-level designation  
274 Woesearchaeota (26). Only nine MAGs had a reference genome in GTDB that  
275 exceeded the minimum alignment fraction (65%); the remainder had no known close  
276 relative (Table 1).

277  
278 Three MAGs representing the highest amplicon frequencies (from all recovered MAGs)  
279 were placed in phylogenies with closely related taxa, confirming their taxonomic

280 assignments (based on GTDB and SILVA) as members of the Woese archaeota (Fig. 4),  
281 *Nitrosopumilus* (Fig. S4), and *Thioglobaceae* (SUP05 clade) (Fig. S5). The two taxa  
282 most closely related to the Woese archaeotal MAG are both from oxygen minimum zones  
283 in the Arabian Sea, with the next most closely related taxa from an iron-rich hot spring  
284 and freshwater. The phylogeny shows Woese archaeotal MAGs from a wide range of  
285 environments interspersed across branches, providing weak support for clustering  
286 according to habitat type (Fig. 4). The AJ *Nitrosopumilus* MAG was most closely related  
287 to a MAG from a cold seep sponge, and relatively distantly removed from the nearest  
288 cultured *Nitrosopumilus* isolate (Fig. S4). The AJ SUP05 MAG was most closely related  
289 to a clade of eight *Thioglobaceae* spp. MAGs from hydrothermal vents, and next-most  
290 closely related to genomes associated with deep-sea invertebrates (Fig. S5).

### 291 292 *Functional annotation*

293  
294 Based on analysis of all metagenome contigs (prior to MAG binning), broad functional  
295 categories (KEGG 'subgroup2' level) separated the 60 m samples from both deep  
296 samples (Fig. S6). Among the categories with a 5-fold or greater difference in frequency  
297 between the sample sets was the KEGG category 'ECM-receptor interaction,' which  
298 contained only two annotated genes (Fig. S7). Notably, a single gene (KO number  
299 K25373, annotated as the eukaryotic protein dentin sialophosphoprotein) occurred at  
300 much higher frequency in the deep samples relative to the 60 m samples. BLASTP  
301 queries against the NCBI nr database linked this sequence to hypothetical proteins from  
302 genomes of the candidate phylum Uhrbacteria (CPR), although these proteins shared  
303 only 30% amino acid identity with the gene in our data. This gene was identified in one  
304 of the two MAGs (BH28) classified as Patescibacteria (CPR), to which the Uhrbacteria  
305 belong. Other categories driving the sample separation included ethylbenzene  
306 degradation, bacterial chemotaxis, and o-glycan biosynthesis (Fig. S6).

307  
308 Although they were not among the most differentiating categories, sulfur and nitrogen  
309 metabolism categories also differed in frequency between the depths (Fig. 5). These  
310 included genes for both assimilatory and dissimilatory metabolism. Some of the most  
311 pronounced differences in sulfur metabolism involved the dissimilatory thiosulfate  
312 (*phsA/psrA*) and sulfite (*dsrAB*) reductases, both of which were enriched in deep  
313 metagenomes. Sulfur metabolism genes enriched in the 60 m metagenomes also  
314 included *dmdABCD*, which encode enzymes for the catabolism of  
315 dimethylsulfoniopropionate (DMSP).

316  
317 Blue hole MAGs encoded a diverse suite of metabolisms (Table 2). We detected genes  
318 involved in both reductive and oxidative pathways of dissimilatory sulfur and nitrogen  
319 cycling, arsenic respiration, methylotrophy, and carbon monoxide metabolism, among



320 others. One MAG (BH25) is one of only two reported members of the Bacteroidota  
321 (formerly Bacteroidetes) phylum potentially capable of dissimilatory sulfur metabolism,  
322 with the other represented by a MAG from a hot spring (27). Most MAGs (23 out of 31)  
323 contained genes involved in arsenic resistance. Genes for arsenic respiration were  
324 detected in three MAGs, with two occurrences of arsenite oxidase gene *aioA* (BH16,  
325 Actinobacterial order *Microtrichales*, and BH24, alphaproteobacterial order  
326 *Rhodospirillales*) and one of arsenate reductase gene *arrA* (BH30, Desulfobacterota  
327 taxon *NaphS2*) (Fig. S8). The latter had 82% amino acid identity with a gene from  
328 another *NaphS2* strain isolated from anoxic sediment in the North Sea (DSM:14454);  
329 this gene is annotated in the FunGene database as *arrA*. Other MAG-affiliated proteins  
330 included nitrous oxide reductase (*nosZ*, in four MAGs representing three phyla), carbon  
331 monoxide dehydrogenase (*cooFS*, in BH30 (*NaphS2*, phylum Desulfobacterota)), and  
332 the ammonia and methane monooxygenases *amoAB* (in BH19, *Nitrosopumilus*) and  
333 *pmoAB* (in BH9 (family *Methylomonadaceae*, Gammaproteobacteria) (Table 2). BH9  
334 also contained several other genes involved in C1 metabolism including *mxuD*, *mch*,  
335 *mtdAB*, and *fae* (data not shown).

336  
337 The Woesearchaeotal MAG (BH21) was notable for its small size (679 Kbp, with 67%  
338 (CheckM) and 73% (anvi'o) completion values). As with other Woesearchaeotal  
339 genomes, genes for several core biosynthetic pathways were missing, including those  
340 for glycolysis/gluconeogenesis, the citric acid cycle, and the pentose phosphate  
341 pathway. Genes linked to glyoxylate and glycarboxylate metabolism and fructose and  
342 mannose metabolism were detected, along with the carbamate kinase *arcC*; however,  
343 no full energetic pathway could be reconstructed.

344  
345 Only one MAG (BH24, order *Rhodospirillales*) contained genes for the full denitrification  
346 pathway ( $\text{NO}_3 \rightarrow \text{N}_2$ ). Other MAGs had the potential to perform individual steps:  
347  $\text{NO}_3 \rightarrow \text{NO}_2$ , seven MAGs;  $\text{NO}_2 \rightarrow \text{NO}$ , six MAGs;  $\text{NO} \rightarrow \text{N}_2\text{O}$ , six MAGs; and  $\text{N}_2\text{O} \rightarrow \text{N}_2$ ,  
348 three MAGs (Table 2).

349  
350 *Microscopy and cell counts*

351  
352 Microscopy-based cell counts (prokaryotes) ranged from  $5 \times 10^6$  to  $7 \times 10^6$  cells/mL  
353 within the hole (data available only from September), almost an order of magnitude  
354 lower than counts above the hole (30 m sample; Fig. S9). Counts were lowest at 80 m,  
355 the depth of the observed turbidity spike.

356  
357 **Discussion**

358

359 Oxygen-deficient marine water columns are crucial habitats for understanding  
360 ecosystem function under oxygen limitation and across gradients of redox substrates,  
361 representing conditions that are predicted to expand substantially in the future (25).  
362 Moreover, these systems have been a critical resource for discoveries of novel  
363 microbial diversity and unforeseen linkages between chemical cycles (19–24). While in  
364 recent years these discoveries have been facilitated by community DNA, RNA, and  
365 protein sequencing, most oxygen-depleted waters have not yet been characterized,  
366 either from an -omics perspective or via cultivation-dependent methods. This is due  
367 partly to the fact that these systems are challenging to sample and span a gradient of  
368 environmental conditions. For example, the Pacific oxygen minimum zones (OMZs) are  
369 anoxic through several hundreds of meters of the water column, cover hundreds of  
370 square kilometers of open ocean, and are relatively unaffected by processes in the  
371 underlying sediment (28). Microbial communities in these systems, especially those  
372 along the peripheries, presumably have periodic exchange with microbial communities  
373 outside the OMZ, for example via eddy intrusion, storms, or offshore transport (20). In  
374 contrast, we describe a very different oxygen-deficient zone with intense but apparently  
375 stable stratification. We show that the semi-enclosed blue hole environment exhibits a  
376 physiochemical profile and microbial community both similar to but also remarkably  
377 distinct from that of other oxygen-deficient water columns.

378  
379 Amberjack Hole is characterized by an oxygen profile unlike that of most OMZs, with a  
380 secondary oxygen peak around 75 m where dissolved oxygen rose to 43% saturation  
381 before dropping back to zero (Fig. 1). In open ocean OMZs, oxygen profiles are typically  
382 unimodal, with concentrations falling along an upper oxycline, staying hypoxic or anoxic  
383 through a core layer, and then gradually increasing below the core as organic  
384 substrates are depleted with depth and microbial respiration slows (29,30). In AJ, the  
385 secondary oxygen peak at 75 m represents either a decline in net oxygen consumption  
386 driven by decreased microbial respiration, a transport-related phenomenon that affects  
387 oxygen supply, or both. Exchange of water between the offshore aquifer and blue hole  
388 water column could affect oxygen dynamics within the hole. However, the water  
389 discharging from the aquifer would be either saline connate water or saline water  
390 traveling long distances through the aquifer (13,31,32). As such, it is unlikely that  
391 oxygen would remain at levels to increase oxygen to 43% saturation. Alternatively,  
392 oxygen may come into the hole by the sinking of dense (high  $\sigma_T$ , Fig 1B) oxygenated  
393 marine waters that intrude onto the shelf. Such an event could occur episodically during  
394 storms but has not been observed for this system. Turnover via severe cooling of  
395 overlying waters, or potentially upwelling and spilling of water from off the shelf, is  
396 presumably rare, and turnover by storm events unlikely. Indeed, preliminary  
397 calculations, assuming only wind-driven mixing and based on the potential energy  
398 anomaly (33), suggest that full turnover of the AJ water column would require wind

399 speeds of 488 mph blowing for 36 hours in conjunction with 2 m/s surface current  
400 velocities in the same direction (Navid Constantinou, personal communication). Thus,  
401 the observed stratification and oxygen profile may be consistent across seasons and  
402 result in a stable bottom layer that is biologically isolated from the surrounding pelagic  
403 environment.

404  
405 AJ Hole is also characterized by a subsurface maximum in  $\text{NO}_3^-$  (nitrate) and/or  $\text{NO}_2^-$   
406 (nitrite) below the main chemocline (Fig. S2), suggesting that dissolved oxygen is also  
407 consumed by nitrification. The decline in  $\text{NO}_x$  coincides with the second sharp drop in  
408 oxygen concentration around 80 m. This drop is followed by the detection of reduced  
409 inorganic compounds, consistent with decreasing redox free energy expectations as a  
410 function of depth. The presence of  $\Sigma\text{S}(-\text{II})$  below 80 m suggests active  $\text{SO}_4^{2-}$  reduction.  
411 Although we detected genes potentially supporting sulfate reduction (e.g., *dsrAB*,  
412 *aprAB*), we cannot rule out the potential that the encoded proteins instead catalyze  
413 oxidative sulfur metabolism. Indeed, preliminary evidence indicates that  $\Sigma\text{S}(-\text{II})$  was  
414 generated at millimolar concentrations in the sediments based on pore water profiles,  
415 and benthic lander chamber sediment flux measurements in fact show that the  
416 sediment-derived  $\Sigma\text{S}(-\text{II})$  fluxes (on the order of  $10 \text{ mM m}^{-2} \text{ day}^{-1}$ ) are comprised entirely  
417 of acid-volatile, purgeable hydrogen sulfide,  $\Sigma\text{H}_2\text{S}$  (Beckler et al., in prep). Thus, it is  
418 likely that the reduced sulfur in the deep water column largely originates from benthic,  
419 rather than water column, sulfate reduction.

420  
421 Reduced sulfur is clearly a key energy source in the deepest layers of the blue hole. We  
422 detected high concentrations of sulfur in intermediate redox states, notably S(II) (i.e.  
423 thiosulfate,  $\text{S}_2\text{O}_3^{2-}$ ) and S(0) (elemental sulfur), overlying a pronounced zone of S(-II)  
424 (hydrogen sulfide) below 80 m. Generally, oxidative sulfur metabolism proceeds with  
425  $\text{H}_2\text{S}/\text{HS}^-$  being oxidized to sulfite and sulfate ( $\text{SO}_3^{2-}/\text{SO}_4^{2-}$ ) with S(0) and  $\text{S}_2\text{O}_3^{2-}$   
426 produced as intermediates (34,35), with the relative completion depending on the pH or  
427 on the composition of the microbial community. Here, the peak concentration of  $\text{S}_2\text{O}_3^{2-}$   
428 was observed at a depth above that of the peak concentration of S(0), suggesting that  
429 different steps in the overall oxidation of  $\Sigma\text{S}(-\text{II})$  may be performed by various vertically-  
430 distributed niches within a complex cycle. We argue that if a single microbial population  
431 was performing complete  $\text{H}_2\text{S}/\text{HS}^-$  oxidation to  $\text{SO}_4^{2-}$  (with S(0) or S(+II) as  
432 intermediates), these compounds should exhibit similar depth distributions, not  
433 stratification.

434  
435 The zone of peak reduced sulfur concentration (peak concentrations of all measured  
436 sulfur compounds) occurred below 80 m (Fig. 1D) and appeared vertically decoupled  
437 from detectable dissolved oxygen, which fell below detection between 74 and 79 m (Fig.  
438 1B). This decoupling suggests the anaerobic sulfur oxidation may also proceed with

439 NO<sub>x</sub> as a terminal oxidant, as NO<sub>x</sub> remained detectable above 90 m and decreased in  
440 concentration with depth as reduced sulfur concentrations increased (Fig. 1). Although  
441 representing only the deepest, most sulfidic layers of the blue hole, metagenomes  
442 contained diverse genes for oxidizing sequentially reduced sulfur compounds, as well  
443 as high abundances of genes for each step of the denitrification pathway (Fig. 5).  
444 Sulfur-driven denitrification is common in marine OMZs (e.g. (36)), notably in  
445 conjunction with gammaproteobacteria of the SUP05 lineage (e.g. (37)). In some cases,  
446 we detected both sulfur oxidation and denitrification genes in the same MAG, including  
447 in the SUP05 (*Thioglobaceae*) MAG (BH20). We also recovered MAGs encoding only  
448 sulfur oxidation proteins or incomplete denitrification pathways (Table 2), a pattern  
449 observed in other low oxygen water columns and suggesting the likely cross-feeding of  
450 sulfur and nitrogen cycle intermediates between taxa (e.g., (38,39)). However, the zone  
451 of stratification of sulfur intermediates, roughly 70-90 m, overlaps with the zone of  
452 oxygen availability (down to 80 m) as measured with the fluorometric sensor, which has  
453 a detection limit only in the low micromolar range. Thus, it is likely that the community in  
454 this depth range consumes both oxygen and oxidized nitrogen species (and potentially  
455 other oxidants) for use in sulfur oxidation, with the relative concentrations of oxidants  
456 and sulfur intermediates potentially driving the vertical separation of microbial niches.

457  
458 Interestingly, the oxic-anoxic transition at 80 m coincided with a sharp spike in turbidity.  
459 This spike was not due to an increase in microbial cell counts (Fig. S9). However, at 80  
460 m, we recorded a sharp increase (to 10% of total) in the frequency of 16S rRNA genes  
461 assigned to *Arcobacter*, a sulfide-oxidizing bacterium known to produce filamentous  
462 sulfur at oxic-anoxic interfaces (40). Between 80 and 90 m, 70-83% of the combined  
463 elemental sulfur (S(0)) and polysulfide ( $\Sigma$ S(-II)) signal was lost after 0.7  $\mu$ m filtration,  
464 suggesting that this lost fraction was in fact elemental sulfur, as polysulfide is soluble  
465 (41,42). We did not sample at 80 m in May and therefore cannot confirm if the sharp  
466 turbidity and *Arcobacter* spikes are stable over time. However, the production of  
467 filamentous or other particulate forms of sulfur under microaerophilic conditions is  
468 consistent with the observed sulfide and oxygen gradients in both months (Fig. 1).  
469 Alternatively, *Arcobacter* may be using NO<sub>x</sub> to oxidize S(-II), as has been shown in  
470 denitrifying members of the genus (43).

471  
472 Other oxidants may also play a role in AJ. Dissolved ferrous iron (Fe(II)) reached a  
473 maximum concentration near the turbidity spike at ~80 m, below the zone of peak  
474 O<sub>2</sub>/NO<sub>x</sub> and above the zone of reduced sulfur (Fig. 1D). Further, total dissolved iron  
475 (Fe<sub>d</sub>), which includes dissolved organically-stabilized Fe(III) and FeS colloids, remained  
476 < 300 nM, but increased below 40 m, peaking just above the dynamic reduced sulfur  
477 zone (Fig. 1D). These patterns hint at a possible cryptic iron cycle, in which  $\Sigma$ H<sub>2</sub>S  
478 diffusing upwards is rapidly oxidized by dissolved Fe(III) (44) to form Fe(II), S(0), and

479  $\Sigma S(-II)$ . Dissolved Fe(III) may then be recycled by reoxidation of Fe(II) by  $O_2$ , and the  
480 S(0)/S(-II) simultaneously oxidized by  $O_2$  or dissolved Fe(III) to form thiosulfate,  $S_2O_3^{2-}$ .  
481 Alternatively,  $\Sigma H_2S$  may first react with Fe(II) to form the detected FeS colloids, which  
482 subsequently oxidize to form Fe(II), S(0), and S(-II). Metabolic pathways for iron  
483 oxidation (or reduction) are not easy to detect with metagenomic data, as iron  
484 metabolism genes play roles in other cellular processes and are therefore suggestive  
485 but not diagnostic of iron metabolism (45,46). Nonetheless, additional metagenomic  
486 sampling at finer spatial resolution may help identify a role for microbial activity in blue  
487 hole iron cycling. The oxidation of iron, however, is rapid even abiotically, and the  
488 vertical distribution of iron in this system can partially explain the apparent vertical  
489 disconnect between the  $\Sigma S(-II)$  and  $O_2$ . Indeed, this phenomenon has been observed in  
490 a nearshore Florida hole (6), in which FeS colloids formed at the interface between 30  
491 and 50 m. AJ appears to be enriched instead in colloidal S(0), with only nanomolar  
492 concentrations of FeS colloids.

493  
494 The pronounced stratification of blue hole chemistry is consistent with differentiation of  
495 microbial communities with depth. In both May and September, microbiome composition  
496 varied distinctly among oxic, hypoxic, and anoxic, sulfidic layers (Fig. 2). Shannon  
497 diversity was similar among all communities, but Simpson diversity was notably higher  
498 in the anoxic depth group (Fig. S3), reflecting the lower evenness of these microbiomes.  
499 Surprisingly, the deepest communities were dominated by a recently described archaeal  
500 lineage, the Woesearchaeota (47). Woesearchaeota have been detected in a wide  
501 variety of biomes, including groundwater, terrestrial and marine sediments, wetlands,  
502 deep-sea hydrothermal vents, and hypersaline lakes (48). However, their relative  
503 abundance is consistently low, at most ~5% of the total microbial community in any  
504 given environment, with the highest proportions observed in freshwater sediments (48)  
505 and high-altitude lakes (49). In contrast, Woesearchaeota comprised at least one third  
506 of the blue hole microbiome between 75 and 106 meters, reaching a maximum of nearly  
507 60% in the anoxic sulfidic layer in September (Fig. 2, Fig. 3). Remarkably, one 16S  
508 rRNA sequence variant represented up to 97% (and only two SVs represented up to  
509 99%) of all Woesearchaeotal amplicons in each sample, suggesting low intrapopulation  
510 diversity. Dominance (>50% of the community) by a single strain variant is relatively  
511 uncommon in pelagic marine microbiomes; it is even more rare that such occurrences  
512 involve members of the Archaea. The AJ Woesearchaeotal MAG, which contained the  
513 dominant 16S rRNA Woesearchaeota amplicon sequence, was 679 Kbp and similar in  
514 size to other Woesearchaeotal genomes, which rarely exceed 1 Mbp (47,48). This MAG  
515 was most closely related to MAGs from an OMZ in the Arabian Sea (Fig. 5), suggesting  
516 the potential for a Woesearchaeotal clade specific to a pelagic, marine, low oxygen  
517 niche. At around 70% completion, the AJ MAG did not contain genes of metabolic  
518 processes common to marine low oxygen systems, notably dissimilatory sulfur or



519 nitrogen cycling, anaerobic metabolism, or autotrophy. Indeed, consistent with  
520 characterizations of other Woesearchaeotal genomes (47,48), AJ Woesearchaeota  
521 appear to have limited metabolic capabilities. It is therefore possible that these cells are  
522 partnered in a syntrophic relationship with other microbes on which they rely for energy  
523 or nutrients, as has been previously suggested (47,48).

524  
525 The Woesearchaeotal MAG was one of several novel lineages in the AJ water column.  
526 From the deepest samples (95 m and 106 m), recovered MAGs included members of  
527 the sulfur-oxidizing SUP05 clade of *Thioglobaceae*, two members of the CPR phylum  
528 Patescibacteria, and three members of the phylum Marinimicrobia (SAR406), among  
529 others (Table 1). The middle water column (60 m) was also populated by  
530 underdescribed taxa, including several lineages of marine Thermoplasmatota and  
531 members of the bacterial phyla Planctomycetota and Myxococcota. Only eight out of  
532 nineteen MAGs from 60 m had identifiable close representatives in the GTDB,  
533 suggesting a high level of taxonomic novelty. Surprisingly, automatic binning did not  
534 recover a Thaumarchaeal MAG from the 60 m assembly despite the large fraction of  
535 amplicon SVs belonging to the ammonia-oxidizing genus *Nitrosopumilus*. However, a  
536 manually binned MAG could be phylogenomically placed in this lineage (Fig. S4) and  
537 contained the dominant SV from the amplicon data set, which comprised up to 86% of  
538 all *Nitrosopumilus* spp. amplicons. As with the Woesearchaeota, this low level of SV  
539 diversity implies population homogeneity. It remains to be determined if this  
540 homogeneity is driven by a potential dearth of ecological niches. Indeed, the AJ  
541 *Nitrosopumilus* MAG, at 725 Kbp, was estimated to be only 53-63% complete (Table 1,  
542 Table S3); its full biochemical potential therefore remains to be characterized. However,  
543 in contrast to recently described and putatively heterotrophic Thaumarchaeota (50,51),  
544 blue hole *Nitrosopumilus*, like all known members of this genus, contain *amoCAB*  
545 encoding ammonia monooxygenase and therefore likely contribute to nitrification in the  
546 blue hole.

547  
548 The 60 m samples also contained six MAGs belonging to the archaeal phylum  
549 Thermoplasmatota. One of these (BH15) could only be placed in the family  
550 Thalassoarchaeaceae. The others included four (BH4, BH11, BH12, and BH13) from  
551 the Marine Group II lineage, which is one of the four major planktonic archaeal groups  
552 (52), and one from the less well-characterized Marine Group III lineage (BH3). The  
553 Marine Group II have recently been proposed as an order-level lineage, *Candidatus*  
554 Poseidoniales, containing two families delineating the current MGIIa and MGIIb clades  
555 (53). Most MGIIa members have been identified from the photic zone, while MGIIb  
556 sequences are largely limited to depths below 200 m, although there are exceptions  
557 (54). Notably, all AJ MGII MAGs belonged to the MGIIb lineage (Table 1). Several  
558 studies have identified genes related to low-oxygen metabolism including reduction of

559 sulfate (55–57) and nitrate (53), suggesting these taxa are more likely to be adapted to  
560 microaerophilic or anaerobic conditions. We found a gene for thiosulfate reduction to  
561 sulfite (*phsA*) in two of the four MGIIb MAGs (Table 2), but no complete pathways for  
562 any forms of anaerobic respiration. Nevertheless, the Marine Group II lineage  
563 comprised over 25% (five out of nineteen) of the MAGs recovered from 60 m,  
564 suggesting this group as an important component to the hypoxic zone community.

565  
566 Metabolic potential differentiated the middle and deep water column communities (Fig.  
567 5, Fig. S6). Many of these functions could be linked to MAGs and represented a range  
568 of anaerobic metabolisms. Genes for dissimilatory sulfide and sulfite oxidation (or  
569 potentially reduction; *dsrAB*, *aprAB*), denitrification (*nar*, *nir*, *nor*, *nos*), and dissimilatory  
570 nitrate reduction to ammonia (DNRA, *nrf*) were enriched in deep anoxic samples, but  
571 also common in the hypoxic zone (60 m) (Table 2, Fig. 5). Other genes linked to MAGs  
572 included *aioAB* and *arrA*, encoding arsenite oxidase and arsenate reductase,  
573 respectively (Fig. S8). Reduction of arsenate to arsenite is thought to be an ancient  
574 metabolic pathway, originating before oxygenation of the Earth's atmosphere and  
575 oceans (58). It has recently been proposed as an important microbial metabolic strategy  
576 in oxygen-deficient marine environments, potentially providing arsenite for use as an  
577 energy source by other microbes (19). Arsenic concentrations in Amberjack have not  
578 been measured. However, the detection of *aioAB* and *arrA*, of which the latter was also  
579 detected in unbinned contigs from the deep co-assembly (Fig. S8), as well as genes for  
580 arsenic detoxification (*arsCM*) in diverse MAGs (including in the *Nitrosopumilus* MAG  
581 described above), suggest a role for arsenic cycling in AJ. Remarkably, one MAG  
582 (BH24, *Rhodospirillales*) contained genes for several of these pathways, representing  
583 an unusual repertoire of respiration strategies (Table S4). Finally, one of the genes with  
584 the largest differences in frequency between 60 m and deep samples encodes an  
585 unknown protein previously observed in genomes of *Candidatus* Uhbacteria, one of the  
586 groups within the CPR/Patescibacteria (Fig. S7). Two MAGs from this group, which is  
587 largely affiliated with freshwater and subsurface aquifer environments, were recovered  
588 from the deep samples, and may play as-yet undetermined ecological roles in this  
589 unusual microbiome. This hypothesis is supported by the low sequence identity of this  
590 protein to similar ones in NCBI.

## 591 592 **Conclusions**

593  
594 The Amberjack Hole water column is potentially highly stable, with complete turnover  
595 (driven either by wind or the sinking of cold water masses) unlikely. Thus, AJ  
596 microbiomes, particularly those in the deepest layers, potentially have limited  
597 connectivity to other marine communities. The extent to which such isolation explains  
598 the observed unique community composition or drives divergence of individual microbial

599 lineages remains uncertain. Undoubtedly, the vertical transport, transformation, and  
600 stratification of redox active elements - notably sulfur, nitrogen, and iron - also play a  
601 significant role in structuring this unusual microbiome. The presumed stability of this  
602 community, its high metabolic diversity, and its dominance by understudied microbial  
603 taxa, highlight AJ as a model for detecting novel biogeochemical processes under low  
604 oxygen. Marine blue holes in general are potentially valuable sites for the study of  
605 microbial diversification and linked elemental cycling.

606

## 607 **Methods**

608

### 609 *Sampling scheme*

610

611 Sampling was conducted May 15-17 2019 and September 19 2019 using the vessels  
612 *R/V William R. Mote* and *R/V Eugenie Clark*. Amberjack Hole is located approximately  
613 50 kilometers west of Sarasota, Florida, at 27.28748 N, -83.16139 W. One component  
614 of the research involved the deployment of an autonomous benthic lander to the bottom  
615 of the hole for 24-48 hours at a time for benthic electrochemistry measurements; these  
616 data are not included in this paper. Technical SCUBA divers who guided the lander into  
617 and out of the hole also collected water samples (see details below).

618

619 In both May and September, all water samples used for nutrient measurements and  
620 microbial DNA preservation were filtered immediately on board. Microbial DNA samples  
621 were stored on ice until the return to Mote Marine Laboratory, where they were stored at  
622 -20°C. Subsequent nutrient analyses described below were conducted at Mote except  
623 where noted.

624

### 625 *Water column physical parameters and dissolved oxygen*

626

627 During the May sampling, an EXO2 sonde (YSI Inc/Xylem Inc, Yellow Springs, Ohio)  
628 was attached to the autonomous lander deployed for 24 hours to the bottom of the hole.  
629 The sensor provided extensive data from the surface (1-2 m) and the bottom position  
630 (106 m) but low-resolution readings from the water column due to rapid ascent and  
631 descent velocities. Dissolved oxygen, temperature, and salinity data were retrieved from  
632 the instrument and plotted in R.

633

634 During the fall sampling, an integrated SBE-19plus V2 CTD with an SBE43 DO sensor,  
635 WET Labs FLNTUrt chlorophyll and turbidity sensor, Satlantic cosine PAR sensor, and  
636 an SBE18 pH sensor (Sea-Bird Electronics Inc) was lowered twice by hand at a rate  
637 that provided high-resolution dissolved oxygen, turbidity, salinity, and density data on

638 September 19 2019. CTD casts were performed the same day as water was sampled  
639 for microbial DNA and nutrients. Data were retrieved and plotted in R as above.

640  
641 SBE data were processed using SBE Data Processing software after compensating for  
642 sensor thermal mass, sensor alignment, timing offset (the delay associated with  
643 pumped sensors, i.e. conductivity), and changes in instrument velocity (due to ship  
644 heave). Data were binned (~0.2 m increments) to smooth data variability. Processed  
645 and derived data included temperature (°C), potential temperature (°C), salinity (psu),  
646 water density ( $\sigma_T$  in kg/m<sup>3</sup>), chlorophyll *a* (µg/L based on relative fluorescence), turbidity  
647 (NTU), dissolved oxygen (mg/L), O<sub>2</sub> saturation (%), pH, PAR, and Brunt-Väisälä  
648 frequency (N = stratification index). Manufacturer recommendations for calibration and  
649 service for all sensors were followed.

650

#### 651 *Water column electrochemical measurements*

652

653 Water samples (~10 m vertical resolution) were subject to solid-state Hg/Au  
654 voltammetric analyses (59) for measurement of the redox environment, i.e. O<sub>2</sub>, Mn(+II),  
655 organic-Fe(III) complexes, Fe(II), S(+II) (in the form of S<sub>2</sub>O<sub>3</sub><sup>-</sup>), S(0), S<sub>x</sub>(-II), and ΣH<sub>2</sub>S  
656 (S<sup>2-</sup>, HS<sup>-</sup>, H<sub>2</sub>S). Briefly, samples collected from the water column at 10 m intervals were  
657 carefully transferred via a Tygon (formula 2375) transfer tube line into LDPE bottles  
658 while filling from bottom to top to minimize atmospheric oxygen contaminations. Sample  
659 bottles remained sealed until analyses and were stored at 4°C. Upon return to the lab  
660 (within 4-6 hours of collection), 20 mL of each sample was carefully pipetted into an  
661 electrochemical cell (Analytical Instrument Systems, Inc.) holding a custom fabricated  
662 Hg/Au amalgam microelectrode working electrode (60), a Pt counter electrode, and a  
663 fritted Ag/AgCl reference electrode (with 3 M KCl electrolyte solution). N<sub>2</sub> was gently  
664 blown over the top of the solution to minimize mixing with the atmosphere. Within 5  
665 minutes, samples were subject to a series of anodic square wave voltammograms  
666 (ASWVs), cathodic square wave voltammograms (CSWVs), and linear sweep  
667 voltammograms (LSVs) to quantify the above redox analytes (59,61). To analytically  
668 distinguish between S(0) and S(-II), which both react at the same potential at an Hg  
669 electrode (42), CSWV measurements were repeated after acidification with HCl (final  
670 pH < 3) and N<sub>2</sub> sparging of the solution for two minutes to remove free ΣH<sub>2</sub>S. This same  
671 electrochemical speciation experiment was conducted a second time in separate  
672 aliquots that were filtered through 0.7 µm GFF filters directly in the N<sub>2</sub>-degassed  
673 electrochemical cell (this filter size was selected for future organic carbon analyses).

674

#### 675 *Nutrient, iron, and DIC measurements*

676

677 Water samples were collected for nutrients and included chlorophyll *a*, dissolved  
678 ammonium ( $\text{NH}_4^+$ ), dissolved  $\text{NO}_x$  (nitrate ( $\text{NO}_3$ ) + nitrite ( $\text{NO}_2$ )), dissolved  
679 orthophosphates ( $\text{PO}_4^{3-}$ ), dissolved total and ferrous iron (Fe), dissolved inorganic  
680 carbon (DIC) and particulate carbon (C), nitrogen (N), and phosphorous (P). All samples  
681 were collected and immediately filtered once shipboard.

682  
683 Chlorophyll *a* was measured according to EPA method 445.0 (62). Briefly, samples  
684 were filtered through a glass fiber filter until clogging, then stored in the dark until  
685 analyses. Prior to analyses, filters were sonicated in 90% acetone to extract chlorophyll  
686 from algal cells and then centrifuged for clarification. The fluorescence of the clarified  
687 extract was then measured using a fluorometer (Turner 10-AU Fluorometer) with special  
688 narrow bandpass filters at an excitation wavelength of 436 nm and an emission  
689 wavelength of 680 nm. Analytical quality assurance followed standard laboratory  
690 practices assessing precision and accuracy using sample replicates, container blanks,  
691 duplicate and spiked analyses with results meeting acceptable levels of precision and  
692 accuracy.

693  
694 Samples for dissolved  $\text{NH}_4^+$  and  $\text{NO}_x$  were filtered through Pall Supor (PES) 450 47 mm  
695 (0.45  $\mu\text{m}$  pore size) membrane filters while samples for particulates were filtered  
696 through pre-combusted (450°C, 3h) 47 mm (0.7  $\mu\text{m}$  pore size) Whatman GF/F filters.  
697 For particulate carbon and nitrogen, 200 mL was filtered per sample and filters were  
698 rinsed with acidified (10% HCl) filtered seawater to remove inorganic carbon. For  
699 particulate P, 500 mL was filtered. Samples were then stored on ice until their return to  
700 the lab and analyzed within 48 hours (dissolved  $\text{NH}_4^+$  and  $\text{NO}_x$ ) or within 28 days  
701 (particulates). Analyses for dissolved nutrients followed colorimetric, segmented flow,  
702 autoanalyzer techniques on an AA3 with method reference and method detection limits  
703 (MDL) as follows: dissolved  $\text{NH}_4^+$  ((63); 0.07  $\mu\text{M}$ ), dissolved  $\text{NO}_x$  ((64); 0.07  $\mu\text{M}$ ).  
704 Particulate phosphorus was analyzed according to (65,66) with in-house modifications  
705 for analysis on a segmented flow analyzer and MDLs of 0.03  $\mu\text{M}$ . For particulate carbon  
706 and nitrogen, samples were analyzed on a Thermo FlashEA1 1112 Elemental Analyzer  
707 with MDLs of 0.2 and 0.1  $\mu\text{M}$ , respectively.

708  
709 To measure DIC, samples were immediately poisoned with  $\text{HgCl}_2$  and stored until  
710 analyses. DIC was analyzed (Apollo AS-C6 DIC Analyzer) following methods by (67).  
711 Accuracy and precision of the instrument was regularly monitored using Certified  
712 Reference Materials for Seawater  $\text{CO}_2$  Measurements (Dickson Laboratory, Scripps  
713 Institution of Oceanography, San Diego, CA; Batch #181 and 186).

714  
715 Soluble orthophosphates ( $\text{PO}_4^{3-}$ ) were measured spectrophotometrically using the  
716 molybdate-blue technique (68).



717  
718 Finally, the speciation of iron was obtained by measuring Fe(II) by the ferrozine assay  
719 (69) in filtered samples before (dissolved Fe(II)) and after (total dissolved Fe) reduction  
720 by hydroxylamine (0.2 M) using a long waveguide spectrophotometric flow cell.  
721 Analytical quality assurance follows standard laboratory practices assessing precision  
722 and accuracy using sample replicates, container blanks, duplicate and spiked analyses  
723 with results meeting acceptable levels of precision and accuracy.

#### 724 725 *Microbial DNA sampling and preservation*

726  
727 Water column samples were collected on May 15 and 17 2019 and September 19 2019.  
728 In May, 800 mL water was collected by divers from depths of 46 m, 61 m, and 106 m  
729 inside the hole. Sterilized Nalgene bottles filled with deionized water were taken down  
730 by the divers, opened at the appropriate depth, and DI water was replaced with ambient  
731 seawater. Niskin bottles deployed on the CTD rosette also collected 1.9 L samples from  
732 depths of 8 m, 15 m, and 23 m above the hole. In May and September, hand-cast  
733 Niskin bottles collected 1 L water from 0 m (surface), 30 m, 60 m, and 85 m (May), and  
734 from 0 m (surface) to 90 m at 10 m intervals, as well as 85 m and 95 m (September).  
735 Samples were filtered onto 0.22  $\mu\text{m}$  Sterivex (MilliporeSigma) filters with a peristaltic  
736 pump and preserved with approximately 3 mL DNA/RNA stabilization buffer (25 mM  
737 sodium citrate, 10 mM EDTA, 5.3 M ammonium sulfate (pH 5.2)) and stored at  $-80^{\circ}\text{C}$  or  
738 on dry ice until further processing at Georgia Tech. In September, unfiltered water from  
739 the following depths was also preserved (1.4 mL water, 150  $\mu\text{L}$  PBS-buffered  
740 formaldehyde) for nucleic acid staining and microscopy and kept frozen at  $-20^{\circ}\text{C}$  until  
741 processing: 30 m, 50 m, 60 m, 70 m, 80 m, 85 m, 90 m, 95 m.

#### 742 743 *Sequencing library preparation*

744  
745 DNA was extracted from each Sterivex cartridge using a custom protocol as described  
746 in (70), except for the September surface (0 m) sample which was lost during sample  
747 transit to Georgia Tech. Briefly, cells were lysed by flushing out RNA stabilizing buffer  
748 and replacing it with lysis buffer (50mM Tris-HCl, 40 mM EDTA, 0.73 M sucrose) and  
749 lysozyme (2 mg in 40 mL of lysis buffer per cartridge), then incubating cartridges for 45  
750 min at  $37^{\circ}\text{C}$ . Proteinase K was added and cartridges were resealed and incubated for 2  
751 h at  $55^{\circ}\text{C}$ . The lysate was removed, and the DNA was extracted once with  
752 phenol:chloroform:isoamyl alcohol (25:24:1) and once with chloroform:isoamyl alcohol  
753 (24:1). Finally, DNA was concentrated by spin dialysis using Ultra-4 (100 kDA, Amicon)  
754 centrifugal filters. Yield was assessed using a Qubit 2.0 dsDNA high-sensitivity assay  
755 (Invitrogen, Carlsbad, CA).

756

757 Illumina MiSeq libraries were prepared by amplifying the V4 region of the 16S rRNA  
758 gene using the environmental DNA protocol adapted from (71). Briefly, amplicons were  
759 generated using Platinum<sup>®</sup> PCR SuperMix (Life Technologies, Carlsbad, CA) with Earth  
760 Microbiome Project primers 515FB and 806RB appended with Illumina-specific  
761 adapters. Template DNA was diluted to approximately 5 ng/μL for all samples and  
762 PCRs were performed in 25-μL reactions using Platinum<sup>®</sup> PCR SuperMix (Life  
763 Technologies) (22 μL), BSA (Invitrogen) (1 μL), and 0.5 μL each of forward and reverse  
764 primer (10 ng/L stock concentration) with 1 μL template DNA. The thermal cycling  
765 protocol consisted of 26 cycles with the following steps: denaturation at 98°C (30 s),  
766 followed by 30 cycles of denaturation at 98°C (5 s), primer annealing at 55°C (5 s) and  
767 primer extension at 72°C (8 s), followed by extension at 72°C for 1 minute. Negative  
768 control reactions were run using 1 μL milliQ water in place of DNA template. Amplicons  
769 were analyzed by gel electrophoresis to verify size (~400 bp, including barcodes and  
770 adaptor sequences) and purified using Diffinity RapidTip2 PCR purification tips (Diffinity  
771 Genomics, West Chester, PA). Amplicons from different samples were pooled at  
772 equimolar concentrations and sequenced using a paired-end Illumina MiSeq 500 cycle  
773 kit (2 x 250 bp) with 5% PhiX to increase read diversity.

774  
775 Metagenomes were generated from four water column samples: two from May (60 m  
776 and 106 m) and two from September (60 m and 95 m). Libraries were prepared using  
777 the Illumina Nextera XT DNA library preparation kit (Illumina Inc., San Diego, CA)  
778 according to manufacturer's instruction and run on a Bioanalyzer 2100 instrument  
779 (Agilent) using a high sensitivity DNA chip to determine library insert sizes. An  
780 equimolar mixture of the libraries (final loading concentration of 12 pM) was sequenced  
781 on an Illumina MiSeq instrument (School of Biological Sciences, Georgia Institute of  
782 Technology), using a MiSeq reagent v2 kit for 600 cycles (2 x 300 bp paired end  
783 protocol).

784  
785 *Amplicon sequence data processing and analysis*

786  
787 Demultiplexed amplicon sequences are available in the Patin FigShare account:  
788 [https://figshare.com/projects/Amberjack\\_Blue\\_Hole/85013](https://figshare.com/projects/Amberjack_Blue_Hole/85013). Raw sequences were run  
789 through the DADA2 algorithm (72) in QIIME2 (73) to assess sequences at sequence  
790 variant resolution, using the following command parameters: --p-trim-left-f 70 --p-trim-  
791 left-r 70 --p-trunc-len-f 150 --p-trunc-len-r 150. Resulting SVs were assigned taxonomy  
792 using the naïve Bayes classifier trained on the Silva 132 database (99% OTUs,  
793 515F/805R sequence region).

794  
795 The SV table with raw read counts of all water samples were exported from QIIME2 and  
796 transformed in R using the variance stabilizing transformation (vst) in the DESeq2

797 package (74). Tables were not rarefied to preserve maximum available information.  
798 Metadata including depth and SV taxonomy were imported and combined into a  
799 Phyloseq object (75,76). Alpha and beta diversity analyses were run in DivNet (77) at  
800 the SV level. Shannon and Simpson diversity results were extracted and plotted by  
801 depth grouping using ggplot2 (78). Beta diversity was assessed using the resulting  
802 Bray-Curtis distance matrix in a principal component analysis using the prcomp()  
803 function in R and visualized in a PCA using ggplot2. The distance matrix was also used  
804 to test for significant difference among samples by depth grouping and month using the  
805 adonis() function in the R vegan package (79) with the following command:  
806 adonis(formula = bc ~ Depth + Month, data = metadata, permutations = 999).

807

### 808 *Metagenomic sequence data processing and analysis*

809

810 Metagenome sequences are available in the Patin FigShare account:  
811 [https://figshare.com/projects/Amberjack\\_Blue\\_Hole/85013](https://figshare.com/projects/Amberjack_Blue_Hole/85013). Raw sequences from the  
812 four metagenomes (May 60 m, May 106 m, September 60 m, September 95 m) were  
813 trimmed and checked for quality and adapter contamination as described for the  
814 amplicons above. Quality controlled reads were run through MicrobeCensus (80) to  
815 generate genome equivalent (GE) values for each metagenome. To generate more  
816 even coverage distribution across the metagenomes, quality controlled reads were  
817 normalized using BBNorm, part of the open source BMap package  
818 (<https://sourceforge.net/projects/bbmap/>).

819

820 Six assemblies were generated from the four water column metagenomes. Individual  
821 assemblies of each sample were generated using metaSPAdes (v3.14.0) (81). Co-  
822 assemblies for each depth pair (May 60 m with September 60 m, and May 106 m with  
823 September 95 m) were also generated using MEGAHIT (v1.2.9) (82) using a minimum  
824 contig length of 2500 bp. All assemblies were assessed for quality using metaQUAST  
825 (83) and annotated using Prokka (84) and the KEGG database.

826

827 For the latter, open reading frames were generated using Prodigal (85) and clustered  
828 using MeShClust (86) at 90% nucleotide identity. The longest sequence from each  
829 cluster was extracted using a custom Python script and these representative sequences  
830 were run against the KEGG ortholog profile HMM models (KOfams) using KofamScan  
831 with the 'prokaryote' database (87). The parameter '-f mapper' was applied to provide  
832 only the most confident annotations (those assigned an individual KO). Orthologies  
833 were matched to their corresponding functions using a parsed version of the  
834 'ko00001.keg' database text file (<https://github.com/edgraham/GhostKoalaParser>),  
835 which provides a three-tiered hierarchical categorization of each gene, referred to here  
836 as 'Group', 'Subgroup1', and 'Subgroup2'. Sequence coverage of each gene was

837 generated by mapping metagenomic short reads against each one using Magic-BLAST  
838 (88). The Magic-BLAST output was filtered to include only the best hit for each read and  
839 the read counts were normalized by GE value of the corresponding metagenome.

840  
841 The normalized counts were used to run hierarchical clustering analyses in Python  
842 using the Seaborn 'clustermap' function. KofamScan outputs were grouped by the three  
843 hierarchical categories to generate heat maps at different levels of categorization. At the  
844 highest categorical level ('Group') the categories 'Human Diseases,' 'Organismal  
845 Systems,' 'Cellular community – eukaryotes,' and 'Brite Hierarchies' were removed  
846 before performing the cluster analysis. The first three groups are not relevant to  
847 microbial gene functions and the fourth provides a different hierarchical categorization  
848 scheme for the same annotations and was thus redundant. All cluster analyses were  
849 run using ward linkage and Euclidean distance methods.

850  
851 Open reading frames generated from the SPAdes individual assemblies were run  
852 through the Hidden Markov Model search tool described in (89) and available at  
853 [https://github.com/ShadeLab/PAPER\\_Dunivin\\_meta\\_arsenic/tree/master/HMM\\_search](https://github.com/ShadeLab/PAPER_Dunivin_meta_arsenic/tree/master/HMM_search)  
854 to query for genes involved in arsenic metabolism. HMM outputs were run through the  
855 data\_preparation.R script (also available in the GitHub repository) to generate plots  
856 showing the quality distributions of hits to the *aioA* and *arrA* genes. The amino acid  
857 sequence of a potential sequence for the *arrA* gene extracted from BH30 (alignment  
858 fraction 89%, bitscore 237) was also queried against the *arrA* BLAST database from the  
859 same toolkit.

860  
861 *Metagenome-assembled genomes*

862  
863 Genomic bins were generated from all individual assemblies as well as co-assemblies.  
864 For each co-assembly, short reads from both metagenomes were submitted to MaxBin  
865 to leverage contig co-variation patterns across samples. All bins were assessed for  
866 quality using CheckM (90) and anvi'o (v6.1) (91). Bins with a quality score greater 40  
867 were retained for dereplication, with quality score calculated as completion – 5 x  
868 contamination (CheckM values). Dereplication was performed with dRep (92) with an  
869 ANI cutoff of 95% for secondary clustering and a 20% minimum pairwise overlap  
870 between genomes. For bins belonging to the same secondary cluster (ie, likely  
871 representing the same microbial population), the highest-quality was chosen as a  
872 representative. In cases where the qualities of two MAGs were within 1%, the  
873 completeness and redundancy values from anvi'o were applied to determine the higher  
874 quality bin. Further analyses were performed on these representative bins.

875

876 All dereplicated high-quality MAGs were assessed for taxonomy with *anvi'o* and the  
877 Genome Taxonomy Database toolkit (GTDB-Tk) (93,94). Each MAG was checked for  
878 the presence of rRNA genes using the *anvi'o* HMM models and one MAG from the 60M  
879 assembly was found to contain a eukaryotic 18S rRNA gene with an 80% match to a  
880 copepod sequence (*Calanus* sp.). This contig was removed from the co-assembly of  
881 origin and the process of binning, quality assessment, and de-replication was repeated.

882  
883 All MAGs were queried for the presence of 16S rRNA gene amplicons by using the SVs  
884 as a query for a BLASTn analysis against the two co-assembly contigs. MAG contigs  
885 containing 100% identity matches across the entire SV length were identified, and the  
886 SV SILVA-based taxonomy was compared with the whole genome taxonomy  
887 assignment from GTDB.

888  
889 All MAGs were functionally annotated using both Prokka and KofamScan as described  
890 above, without the read mapping step. The following genes were verified by running  
891 amino acid sequences against the NCBI-nr database using blastp: *pmoA-amoA*  
892 (K10944; KEGG), *pmoB-amoB* (K10955; KEGG), *pmoC-amoC* (K10956; KEGG),  
893 K23573 (DSPP, dentin sialophosphoprotein; KEGG), *pmoA* (Prokka), *pmoB* (Prokka),  
894 *aiob* (Prokka), *arsC2* (Prokka), *arsM* (Prokka). To confirm the annotations of arsenic  
895 respiration and resistance genes, and to query other genes involved in arsenic  
896 metabolism, including the arsenate reductase gene *arrA*, all MAGs were run through the  
897 Hidden Markov Model search tool described in (89) and available at  
898 [https://github.com/ShadeLab/PAPER\\_Dunivin\\_meta\\_arsenic/tree/master/HMM\\_search](https://github.com/ShadeLab/PAPER_Dunivin_meta_arsenic/tree/master/HMM_search).

899  
900 *Manual MAG refinement and generation*

901  
902 Six MAGs contained more than one 16S rRNA gene SV. In cases where the SVs within  
903 a MAG were distantly related to each other, any contigs containing a copy that was  
904 divergent from the genome-wide GTDB-TK taxonomic assessment were removed from  
905 the bin. Quality assessments were repeated on the edited MAG using CheckM and  
906 *anvi'o*, and if the quality score (as defined above) was over 5 points lower than the  
907 original MAG, the edited MAG was discarded. This happened in only one case (BH22);  
908 all other MAGs were kept in their edited form.

909  
910 One of these edited MAGs was BH28, classified by GTDB as Patescibacteria but  
911 containing an SV classified as *Magnetospiraceae* (Alphaproteobacteria,  
912 Rhodospirillales) by SILVA. Conversely, BH24, which was classified by GTDB as  
913 Rhodospirillales, contained no 16S rRNA genes. The contig containing the  
914 *Magnetospiraceae* SV was removed from the Patescibacteria bin and added to BH24  
915 based on its tetranucleotide clustering proximity to other contigs in that bin (as seen in



916 the anvi'o interactive interface) and the matching taxonomy between the MAG and the  
917 SV.

918  
919 The dominant *Nitrosopumilus* amplicon SV was not present in any of the MAGs  
920 generated from the 60 M samples. However, it was found on an unbinned contig in the  
921 60M co-assembly. The anvi'o interactive interface was used to manually generate a bin  
922 containing this sequence, along with a 23S rRNA sequence with 99% identity to  
923 *Nitrosopumilus catalina*, and other contigs of similar tetranucleotide frequency, GC  
924 content, and coverage (BH19). This MAG was assessed for quality using CheckM and  
925 anvi'o.

926  
927 All MAGs were run through GTDB using the 'classify\_wf' (for taxonomic classification)  
928 and 'ani\_rep' (for closest relative by ANI) commands in GTDB-Tk (93), and through  
929 Prokka (84) and KofamScan (87) for functional annotation. Closest relatives were  
930 determined using a minimum 65% alignment fraction; if no reference genome exceeded  
931 this minimum there was no result.

932  
933 All MAG sequences are available in the Patin FigShare account:  
934 [https://figshare.com/projects/Amberjack\\_Blue\\_Hole/85013](https://figshare.com/projects/Amberjack_Blue_Hole/85013).

935  
936 *Phylogenomic analyses*

937  
938 Phylogenomic trees were generated for the MAGs BH19 (*Nitrosopumilus*), BH20  
939 (SUP05 clade, *Thioglobaceae*), and BH21 (Woese archaeota). In each case, genomes  
940 with the same or similar taxonomy as the MAG were downloaded from the NCBI  
941 Assembly database and run through anvi'o for quality assessment using anvi-estimate-  
942 genome-completeness. High-quality MAGs (quality score > 40 as defined above) were  
943 retained (Table S4) and single-copy genes were extracted using the anvi'o script anvi-  
944 get-sequences-for-hmm-hits. The two archaeal MAGs (BH19 and BH21) were run  
945 against the 'Archaea\_76' HMM database and the bacterial MAG (BH20) was run  
946 against the 'Bacteria\_71' HMM database. Genes occurring in most or all MAGs were  
947 concatenated and aligned (see Table S4 for taxon-specific minimum gene occurrences).  
948 The alignment was run through RAxML (95) with optimization of substitution rates and a  
949 GAMMA model of rate heterogeneity ("PROTGAMMA" substitution model) with 999  
950 bootstraps for a maximum likelihood phylogeny. The resulting .tre files were uploaded to  
951 the interactive Tree of Life website (96) ([itol.embl.de](http://itol.embl.de)) and labeled with their strain or  
952 sample of origin.

953  
954 *Cell staining and microscopy*

955

956 Duplicate samples from the following depths were processed for microscopy: 30 m, 50  
957 m, 70 m, 80 m, and 95 m. Samples preserved in PBS-buffered formaldehyde (1.55 mL  
958 total) were combined with 2.0 mL milliQ water and filtered onto 0.2  $\mu\text{m}$  GTBP filters  
959 (Millipore) using vacuum filtration. Filters were dried for approximately 20 minutes and  
960 incubated in the dark on ice with 50  $\mu\text{L}$  DAPI (0.2  $\mu\text{g}/\text{mL}$ ). Filters were then rinsed in  
961 milliQ water and 100% ethanol, dried for approximately 10 minutes, and placed on a  
962 microscope slide with one drop of Citifluor (Electron Microscopy Sciences). Slides were  
963 visualized with a Zeiss Axio Observer D1 confocal epifluorescence microscope using a  
964 DAPI filter (Zeiss filter set 49). Between twenty and twenty-five photographs were taken  
965 in a grid pattern from each slide and counted in ImageJ (97) using a custom script. The  
966 average value of cell counts from all photos for each sample was plotted in Microsoft  
967 Excel.

968

### 969 **Figure legends**

970

971 Figure 1. The blue hole water column in September 2019 was highly stratified. (A)  
972 Compared to the overlying water, salinity was slightly higher and pH was slightly lower  
973 inside the hole (i.e. below 30 m). A coincident dip in salinity and rise in pH was present  
974 at 75 m. (B) Dissolved oxygen concentrations varied widely, with both a primary and  
975 secondary oxycline. At 80 m, the onset of anoxia immediately below the secondary  
976 oxycline coincided with a spike in turbidity. (C) Dissolved inorganic carbon (DIC)  
977 increased slightly from 20 to 50 m but more intensely between 70 and 90 m, from  
978 approximately 2.2 to 2.5 mM. A sharp increase in  $\text{NO}_x$  ( $\text{NO}_2^- + \text{NO}_3^-$ ) between 40 and 50  
979 m was followed by a return to near 0 between 60 and 90 m. Phosphate ( $\text{PO}_4^{3-}$ ) and  
980 ammonium ( $\text{NH}_4^+$ ) remained below 1  $\mu\text{M}$  before increasing to 5-6  $\mu\text{M}$  between 70 m and  
981 80 m, respectively. (D) Dissolved ferrous iron ( $\text{Fe(II)}_d$ ), and total dissolved iron ( $\text{Fe}_d$ )  
982 increased with the transition to anoxia. Sulfur species are presented as follows:  $\text{S}_2\text{O}_3^{2-}$   
983 (thiosulfate, S in the +II oxidation state) peaked between 80 and 90 m. S(0) represents  
984 combined dissolved and colloidal elemental sulfur; however, the dissolved fraction may  
985 also include a small amount of polysulfide species (i.e.  $\text{S}_x(-\text{II})$ ). Finally,  $\Sigma\text{S}(-\text{II})$   
986 represents primarily hydrogen sulfide ( $\text{HS}^-$ ) but could also be minorly redundant with  
987 S(0). All iron and sulfur species increased sharply by 70-85 m, with S(0) representing  
988 the largest component of the reduced sulfur pool.

989

990 Figure 2. Microbial communities represented three water column depth groupings:  
991 shallow (0-32 m), middle (40-70 m), and deep (80-95 m). (A) Principal components  
992 analysis shows communities were highly similar within each depth grouping regardless  
993 of sampling date. (B) Community composition of representative samples from each of  
994 the three depth groupings show both middle and deep water column layers feature high  
995 levels (~40% frequency) of a single taxon, the ammonia-oxidizing *Nitrosopumilus* sp. in

996 the middle water column and the Woesearchaeota in the deepest layers. Samples  
997 shown here are from September 2019 at 30 m, 40 m, and 85 m.

998

999 Figure 3. The relative abundances of the most commonly observed taxa are similar  
1000 between May (A, B) and September (C, D). Notably, *Nitrosopumilus* sp. and  
1001 Woesearchaeota dominated the middle and deep water column, respectively. The  
1002 sulfur-oxidizing SUP05 clade increased continuously with depth in May but decreased in  
1003 frequency below 70 m in September, while *Arcobacter* sp. spiked sharply at 80 m in  
1004 September. Sampled depths are represented by points on each line.

1005

1006 Figure 4. Phylogenomic analysis of the Woesearchaeotal MAG and ninety publicly  
1007 available MAGs from a range of biomes show the AJ population is mostly closely  
1008 related to Woesearchaeota from other marine water columns.

1009

1010 Figure 5. Relative abundances of genes involved in sulfur (A) and nitrogen (B)  
1011 metabolism in each metagenome (May 60 m, May 106 m, September 60 m, September  
1012 95 m) show some dissimilatory genes, such as *dsrAB* and *napAB*, are enriched in the  
1013 deep water layer.

1014

## 1015 **Table Legends**

1016

1017 Table 1. All de-replicated, high-quality metagenome-assembled genomes (MAGs) from  
1018 the 60 m and deep co-assemblies, as well as one MAG from the September 95 m  
1019 individual assembly. Taxonomy assessed at the whole-genome level and nearest  
1020 relative (GTDB) are provided. If applicable, taxonomy according to the associated 16S  
1021 rRNA gene (SILVA) is provided with additional higher-order classification in  
1022 parentheses. Amplicon frequencies for corresponding SVs are provided for each  
1023 sample. One MAG contained two SVs (\*, see Table S3) and here the frequencies for  
1024 the first SV are provided.

1025

1026 Table 2. Taxonomy and functional annotations identified in each MAG. The biochemical  
1027 process associated with each gene is provided by headers in bold.

1028

1029 Table S1. Amberjack Hole water column sample metadata and amplicon sequencing  
1030 results. Processed reads are those that were quality-filtered, trimmed, and run through  
1031 DADA2.

1032

1033 Table S2. Metagenome assembly data including sample source, pre- and post-quality  
1034 filtered reads, and assembly statistics for both single and co-assemblies.

1035

1036 Table S3. Metagenome-assembled genomes (MAGs) and their associated samples,  
1037 quality metrics, and assigned taxonomy.

1038  
1039 Table S4. Metagenome-assembled genomes (MAGs) assessed in the phylogenomic  
1040 trees (Fig. 4, Fig. S4, Fig. S5) including the Amberjack MAG of interest and the source  
1041 of all other MAGs included in the phylogeny.

1042

#### 1043 **Conflicts of interest**

1044

1045 The authors declare no conflict of interest.

1046

#### 1047 **Funding**

1048

1049 This work was funded by the National Oceanic and Atmospheric Administration Office of  
1050 Exploration and Research (grant #NA18OAR0110291).

1051

#### 1052 **Acknowledgments**

1053

1054 We thank the captains of the *R/V William R. Mote* and *R/V Eugenie Clark* for their  
1055 support and professionalism, and staff at Mote Marine Lab for their work in sample  
1056 collection and processing. We are grateful to Dr. Navid Constantinou for his help  
1057 modeling the wind speeds required for turnover of the water column.

1058

1059

#### 1060 **References**

1061

1062 1. Mylroie JE, Carew JL, Moore AI. Blue Holes: Definition and Genesis. *Carbonates*  
1063 *and Evaporates*. 1995;10(2):225–33.

1064 2. Canganella F, Bianconi G, Kato C, Gonzalez J. Microbial ecology of submerged  
1065 marine caves and holes characterized by high levels of hydrogen sulphide.

1066 *Reviews in Environmental Science and Biotechnology*. 2007.

1067 3. Gischler E, Shinn EA, Oschmann W, Fiebig J, Buster NA. A 1500-Year Holocene  
1068 Caribbean Climate Archive from the Blue Hole, Lighthouse Reef, Belize. *J Coast*  
1069 *Res*. 2008;

1070 4. Pohlman JW. The biogeochemistry of anchialine caves: Progress and

- 1071 possibilities. *Hydrobiologia*. 2011.
- 1072 5. Seymour JR, Humphreys WF, Mitchell JG. Stratification of the microbial  
1073 community inhabiting an anchialine sinkhole. *Aquat Microb Ecol*. 2007;
- 1074 6. Garman KM, Rubelmann H, Karlen DJ, Wu T, Garey JR. Comparison of an  
1075 inactive submarine spring with an active nearshore anchialine spring in Florida.  
1076 *Hydrobiologia*. 2011;
- 1077 7. Gonzalez BC, Iliffe TM, Macalady JL, Schaperdoth I, Kakuk B. Microbial hotspots  
1078 in anchialine blue holes: Initial discoveries from the Bahamas. *Hydrobiologia*.  
1079 2011;
- 1080 8. Davis MC, Garey JR. Microbial function and hydrochemistry within a stratified  
1081 anchialine sinkhole: A window into coastal aquifer interactions. *Water*  
1082 (Switzerland). 2018;
- 1083 9. Yao P, Wang XC, Bianchi TS, Yang ZS, Fu L, Zhang XH, et al. Carbon Cycling in  
1084 the World's Deepest Blue Hole. *J Geophys Res Biogeosciences*. 2020;
- 1085 10. He H, Fu L, Liu Q, Fu L, Bi N, Yang Z, et al. Community Structure, Abundance  
1086 and Potential Functions of Bacteria and Archaea in the Sansha Yongle Blue Hole,  
1087 Xisha, South China Sea. *Front Microbiol*. 2019;
- 1088 11. He P, Xie L, Zhang X, Li J, Lin X, Pu X, et al. Microbial Diversity and Metabolic  
1089 Potential in the Stratified Sansha Yongle Blue Hole in the South China Sea. *Sci*  
1090 *Rep*. 2020;
- 1091 12. DeWitt D. Submarine Springs and other Karst Features in Offshore Waters of the  
1092 Gulf of Mexico and Tampa Bay, Southwest Florida Water Management District.  
1093 2003.



- 1094 13. Hughes JD, Vacher HL, Sanford WE. Three-dimensional flow in the Florida  
1095 platform: Theoretical analysis of Kohout convection at its type locality. *Geology*.  
1096 2007;
- 1097 14. Hu C, Muller-Karger FE, Swarzenski PW. Hurricanes, submarine groundwater  
1098 discharge, and Florida's red tides. *Geophys Res Lett*. 2006;
- 1099 15. Smith CG, Swarzenski PW. An investigation of submarine groundwater-borne  
1100 nutrient fluxes to the west Florida shelf and recurrent harmful algal blooms. *Limnol*  
1101 *Oceanogr*. 2012;
- 1102 16. Walsh JJ, Jolliff JK, Darrow BP, Lenos JM, Milroy SP, Remsen A, et al. Red tides  
1103 in the Gulf of Mexico: Where, when, and why? *J Geophys Res*.  
1104 2006;111(C11003):1–46.
- 1105 17. Weisberg RH, Liu Y, Lembke C, Lu C, Hubbard C, Garrett M. The coastal ocean  
1106 circulation influence on the 2018 West Florida Shelf *K. brevis* red tide bloom. *J*  
1107 *Geophys Res Ocean*. 2019;124(4):2501–12.
- 1108 18. Vargo GA, Heil CA, Fanning KA, Dixon LK, Neely MB, Lester K, et al. Nutrient  
1109 availability in support of *Karenia brevis* blooms on the central West Florida Shelf:  
1110 What keeps *Karenia* blooming? *Cont Shelf Res*. 2008;
- 1111 19. Saunders JK, Fuchsman CA, McKay C, Rocap G. Complete arsenic-based  
1112 respiratory cycle in the marine microbial communities of pelagic oxygen-deficient  
1113 zones. *Proc Natl Acad Sci U S A*. 2019;
- 1114 20. Callbeck CM, Lavik G, Ferdelman TG, Fuchs B, Gruber-Vodicka HR, Hach PF, et  
1115 al. Oxygen minimum zone cryptic sulfur cycling sustained by offshore transport of  
1116 key sulfur oxidizing bacteria. *Nat Commun*. 2018;

- 1117 21. Garcia-Robledo E, Padilla CC, Aldunate M, Stewart FJ, Ulloa O, Paulmier A, et al.  
1118 Cryptic oxygen cycling in anoxic marine zones. *Proc Natl Acad Sci U S A*. 2017;
- 1119 22. Sun X, Kop LFM, Lau MCY, Frank J, Jayakumar A, Lückner S, et al. Uncultured  
1120 Nitrospina-like species are major nitrite oxidizing bacteria in oxygen minimum  
1121 zones. *ISME J*. 2019;
- 1122 23. Tsementzi D, Wu J, Deutsch S, Nath S, Rodriguez-R LM, Burns AS, et al. SAR11  
1123 bacteria linked to ocean anoxia and nitrogen loss. *Nature*. 2016;
- 1124 24. Thamdrup B, Steinsdóttir HGR, Bertagnolli AD, Padilla CC, Patin N V., Garcia-  
1125 Robledo E, et al. Anaerobic methane oxidation is an important sink for methane in  
1126 the ocean's largest oxygen minimum zone. *Limnol Oceanogr*. 2019;
- 1127 25. Breitburg D, Levin LA, Oschlies A, Grégoire M, Chavez FP, Conley DJ, et al.  
1128 Declining oxygen in the global ocean and coastal waters. *Science*. 2018.
- 1129 26. Baker BJ, De Anda V, Seitz KW, Dombrowski N, Santoro AE, Lloyd KG. Diversity,  
1130 ecology and evolution of Archaea. *Nature Microbiology*. 2020.
- 1131 27. Thiel V, Costas AMG, Fortney NW, Martinez JN, Tank M, Roden EE, et al.  
1132 "Candidates thermonerobacter thiotrophicus," a non-phototrophic member of the  
1133 Bacteroidetes/Chlorobi with dissimilatory sulfur metabolism in hot spring mat  
1134 communities. *Front Microbiol*. 2019;
- 1135 28. Helly JJ, Levin LA. Global distribution of naturally occurring marine hypoxia on  
1136 continental margins. *Deep Res Part I Oceanogr Res Pap*. 2004;
- 1137 29. Wyrтки K. The oxygen minima in relation to ocean circulation. *Deep Res Oceanogr*  
1138 *Abstr*. 1962;
- 1139 30. Thamdrup B, Dalsgaard T, Revsbech NP. Widespread functional anoxia in the

- 1140 oxygen minimum zone of the Eastern South Pacific. *Deep Res Part I Oceanogr*  
1141 *Res Pap.* 2012;
- 1142 31. Garman KM, Garey JR. The transition of a freshwater karst aquifer to an anoxic  
1143 marine system. *Estuaries.* 2005;
- 1144 32. Hughes JD, Vacher HL, Sanford WE. Temporal response of hydraulic head,  
1145 temperature, and chloride concentrations to sea-level changes, Floridan aquifer  
1146 system, USA. *Hydrogeol J.* 2009;
- 1147 33. Simpson JH. The shelf-sea fronts: implications of their existence and behaviour.  
1148 *Philos Trans R Soc London Ser A, Math Phys Sci.* 1981;
- 1149 34. Luther GW, Findlay AJ, MacDonald DJ, Owings SM, Hanson TE, Beinart RA, et  
1150 al. Thermodynamics and kinetics of sulfide oxidation by oxygen: a look at  
1151 inorganically controlled reactions and biologically mediated processes in the  
1152 environment. *Front Microbiol.* 2011;2(62):1–9.
- 1153 35. Ghosh W, Dam B. Biochemistry and molecular biology of lithotrophic sulfur  
1154 oxidation by taxonomically and ecologically diverse bacteria and archaea. *FEMS*  
1155 *Microbiology Reviews.* 2009.
- 1156 36. Wright JJ, Konwar KM, Hallam SJ. Microbial ecology of expanding oxygen  
1157 minimum zones. *Nature Reviews Microbiology.* 2012.
- 1158 37. Walsh DA, Zaikova E, Howes CG, Song YC, Wright JJ, Tringe SG, et al.  
1159 Metagenome of a versatile chemolithoautotroph from expanding oceanic dead  
1160 zones. *Science (80- ).* 2009;
- 1161 38. Hawley AK, Brewer HM, Norbeck AD, Pasă-Tolić L, Hallam SJ. Metaproteomics  
1162 reveals differential modes of metabolic coupling among ubiquitous oxygen

- 1163 minimum zone microbes. Proc Natl Acad Sci U S A. 2014;
- 1164 39. Bertagnolli AD, Stewart FJ. Microbial niches in marine oxygen minimum zones.  
1165 Nature Reviews Microbiology. 2018.
- 1166 40. Wirsen CO, Sievert SM, Cavanaugh CM, Molyneaux SJ, Ahmad A, Taylor LT, et  
1167 al. Characterization of an autotrophic sulfide-oxidizing marine *Arcobacter* sp. that  
1168 produces filamentous sulfur. Appl Environ Microbiol. 2002;
- 1169 41. Rozan TF, Theberge SM, Luther G. Quantifying elemental sulfur (S<sub>0</sub>), bisulfide  
1170 (HS<sup>-</sup>) and polysulfides (S<sub>x</sub><sup>2-</sup>) using a voltammetric method. Anal Chim Acta.  
1171 2000;
- 1172 42. Luther GW, Glazer BT, Hohmann L, Popp JI, Taillefert M, Rozan TF, et al. Sulfur  
1173 speciation monitored in situ with solid state gold amalgam voltammetric  
1174 microelectrodes: Polysulfides as a special case in sediments, microbial mats and  
1175 hydrothermal vent waters. J Environ Monit. 2001;
- 1176 43. Heylen K, Vanparys B, Wittebolle L, Verstraete W, Boon N, De Vos P. Cultivation  
1177 of denitrifying bacteria: Optimization of isolation conditions and diversity study.  
1178 Appl Environ Microbiol. 2006;
- 1179 44. Taillefert M, Bono AB, Luther GW. Reactivity of Freshly Formed Fe(III) in  
1180 Synthetic Solutions and (Pore)Waters: Voltammetric Evidence of an Aging  
1181 Process. Environ Sci Technol. 2000;34(11):2169–77.
- 1182 45. Barco RA, Emerson D, Sylvan JB, Orcutt BN, Jacobson Meyers ME, Ramírez GA,  
1183 et al. New insight into microbial iron oxidation as revealed by the proteomic profile  
1184 of an obligate iron-oxidizing chemolithoautotroph. Appl Environ Microbiol. 2015;
- 1185 46. Garber AI, Nealson KH, Okamoto A, McAllister SM, Chan CS, Barco RA, et al.

- 1186 FeGenie: A Comprehensive Tool for the Identification of Iron Genes and Iron  
1187 Gene Neighborhoods in Genome and Metagenome Assemblies. *Front Microbiol.*  
1188 2020;
- 1189 47. Castelle CJ, Wrighton KC, Thomas BC, Hug LA, Brown CT, Wilkins MJ, et al.  
1190 Genomic expansion of domain archaea highlights roles for organisms from new  
1191 phyla in anaerobic carbon cycling. *Curr Biol.* 2015;
- 1192 48. Liu X, Li M, Castelle CJ, Probst AJ, Zhou Z, Pan J, et al. Insights into the ecology,  
1193 evolution, and metabolism of the widespread Woesearchaeotal lineages.  
1194 *Microbiome.* 2018;
- 1195 49. Ortiz-Alvarez R, Casamayor EO. High occurrence of Pacearchaeota and  
1196 Woesearchaeota (Archaea superphylum DPANN) in the surface waters of  
1197 oligotrophic high-altitude lakes. *Environ Microbiol Rep.* 2016;
- 1198 50. Aylward FO, Santoro AE. Heterotrophic Thaumarchaea with Small Genomes Are  
1199 Widespread in the Dark Ocean. *mSystems.* 2020;
- 1200 51. Reji L, Francis CA. Metagenome-assembled genomes reveal unique metabolic  
1201 adaptations of a basal marine Thaumarchaeota lineage. *ISME J.* 2020;
- 1202 52. Santoro AE, Richter RA, Dupont CL. Planktonic Marine Archaea. *Ann Rev Mar*  
1203 *Sci.* 2019;
- 1204 53. Rinke C, Rubino F, Messer LF, Youssef N, Parks DH, Chuvochina M, et al. A  
1205 phylogenomic and ecological analysis of the globally abundant Marine Group II  
1206 archaea (Ca. Poseidoniales ord. nov.). *ISME J.* 2019;
- 1207 54. Pereira O, Hochart C, Auguet JC, Debroas D, Galand PE. Genomic ecology of  
1208 Marine Group II, the most common marine planktonic Archaea across the surface



- 1209 ocean. Microbiologyopen. 2019;
- 1210 55. Martin-Cuadrado AB, Garcia-Heredia I, Moltó AG, López-Úbeda R, Kimes N,  
1211 López-García P, et al. A new class of marine Euryarchaeota group II from the  
1212 mediterranean deep chlorophyll maximum. ISME J. 2015;
- 1213 56. Moreira D, Rodríguez-Valera F, López-García P. Analysis of a genome fragment  
1214 of a deep-sea uncultivated Group II euryarchaeote containing 16S rDNA, a  
1215 spectinomycin-like operon and several energy metabolism genes. Environ  
1216 Microbiol. 2004;
- 1217 57. Martin-Cuadrado AB, Rodriguez-Valera F, Moreira D, Alba JC, Ivars-Martínez E,  
1218 Henn MR, et al. Hindsight in the relative abundance, metabolic potential and  
1219 genome dynamics of uncultivated marine archaea from comparative  
1220 metagenomic analyses of bathypelagic plankton of different oceanic regions.  
1221 ISME J. 2008;
- 1222 58. Sforna MC, Philippot P, Somogyi A, Van Zuilen MA, Medjoubi K, Schoepp-  
1223 Cothenet B, et al. Evidence for arsenic metabolism and cycling by  
1224 microorganisms 2.7 billion years ago. Nat Geosci. 2014;
- 1225 59. Luther GW, Glazer BT, Ma S, Trouwborst RE, Moore TS, Metzger E, et al. Use of  
1226 voltammetric solid-state (micro)electrodes for studying biogeochemical processes:  
1227 Laboratory measurements to real time measurements with an in situ  
1228 electrochemical analyzer (ISEA). Mar Chem. 2008;
- 1229 60. Brendel PJ, Luther GW. Development of a Gold Amalgam Voltammetric  
1230 Microelectrode for the Determination of Dissolved Fe, Mn, O<sub>2</sub>, and S(-II) in  
1231 Porewaters of Marine and Freshwater Sediments. Environ Sci Technol. 1995;

- 1232 61. Tercier-Waeber M Lou, Taillefert M. Remote in situ voltammetric techniques to  
1233 characterize the biogeochemical cycling of trace metals in aquatic systems.  
1234 Journal of Environmental Monitoring. 2008.
- 1235 62. Arar EJ, Collins GB. Method 445.0 In Vitro Determination of Chlorophyll a and  
1236 Pheophytin a in Marine and Freshwater Algae by Fluorescence. 1997.
- 1237 63. Bran+Luebbe/Seal. Ammonia in water and seawater. Method No G-171-96 Rev  
1238 10. 2005;Norderstedt, Germany.
- 1239 64. Bran+Luebbe/Seal. Nitrate and nitrite in water and seawater; total nitrogen in  
1240 persulfate digests. Method No G-172-96 Rev 10. 2010;Norderstedt, Germany.
- 1241 65. Solórzano L, Sharp JH. Determination of total dissolved phosphorus and  
1242 particulate phosphorus in natural waters. Limnology and Oceanography. 1980.
- 1243 66. Solórzano L, Sharp JH. Determination of total dissolved nitrogen in natural  
1244 waters. Limnology and Oceanography. 1980.
- 1245 67. Dickson AG, Sabine CL, Christian JR. Guide to best practices for ocean CO<sub>2</sub>  
1246 measurements. PICES Spec Publ 3. 2007;
- 1247 68. Murphy J, Riley JP. A modified single solution method for the determination of  
1248 phosphate in natural waters. Anal Chim Acta. 1962;
- 1249 69. Stookey LL. Ferrozine-A New Spectrophotometric Reagent for Iron. Anal Chem.  
1250 1970;
- 1251 70. Padilla CC, Bertagnolli AD, Bristow LA, Sarode N, Glass JB, Thamdrup B, et al.  
1252 Metagenomic binning recovers a transcriptionally active gammaproteobacterium  
1253 linking methanotrophy to partial denitrification in an anoxic oxygen minimum zone.  
1254 Front Mar Sci. 2017;

- 1255 71. Kozich JJ, Westcott SL, Baxter NT, Highlander SK, Schloss PD. Development of  
1256 a dual-index sequencing strategy and curation pipeline for analyzing amplicon  
1257 sequence data on the MiSeq Illumina sequencing platform. *Appl Environ*  
1258 *Microbiol.* 2013;79(17):5112–20.
- 1259 72. Callahan BJ, McMurdie PJ, Rosen MJ, Han AW, Johnson AJA, Holmes SP.  
1260 DADA2: High-resolution sample inference from Illumina amplicon data. *Nat*  
1261 *Methods.* 2016;
- 1262 73. Bolyen E, Rideout JR, Dillon MR, Bokulich NA, Abnet CC, Al-Ghalith GA, et al.  
1263 Reproducible, interactive, scalable and extensible microbiome data science using  
1264 QIIME 2. *Nat Biotechnol.* 2019;37:852–7.
- 1265 74. Love MI, Huber W, Anders S. Moderated estimation of fold change and dispersion  
1266 for RNA-seq data with DESeq2. *Genome Biol.* 2014;
- 1267 75. McMurdie PJ, Holmes S. Phyloseq: An R Package for Reproducible Interactive  
1268 Analysis and Graphics of Microbiome Census Data. *PLoS One.* 2013;
- 1269 76. McMurdie PJ, Holmes S. Waste Not, Want Not: Why Rarefying Microbiome Data  
1270 Is Inadmissible. *PLoS Comput Biol.* 2014;10(4):e1003531.
- 1271 77. Willis AD, Martin BD. DivNet: Estimating diversity in networked communities.  
1272 *bioRxiv.* 2018;
- 1273 78. Wickham H. *ggplot2: Elegant Graphics for Data Analysis.* New York: Springer-  
1274 Verlag; 2016.
- 1275 79. Oksanen J, Blanchet FG, Friendly M, Kindt R, Legendre P, Mcglinn D, et al.  
1276 *vegan: Community Ecology Package [Internet].* Community ecology package.  
1277 2019. p. R package version 2.5-5. Available from: <https://cran.r->

- 1278            project.org/package=vegan
- 1279    80.    Nayfach S, Pollard KS. Average genome size estimation improves comparative  
1280            metagenomics and sheds light on the functional ecology of the human  
1281            microbiome. *Genome Biol.* 2015;
- 1282    81.    Nurk S, Meleshko D, Korobeynikov A, Pevzner PA. MetaSPAdes: A new versatile  
1283            metagenomic assembler. *Genome Res.* 2017;
- 1284    82.    Li D, Liu CM, Luo R, Sadakane K, Lam TW. MEGAHIT: An ultra-fast single-node  
1285            solution for large and complex metagenomics assembly via succinct de Bruijn  
1286            graph. *Bioinformatics.* 2015;
- 1287    83.    Mikheenko A, Saveliev V, Gurevich A. MetaQUAST: Evaluation of metagenome  
1288            assemblies. *Bioinformatics.* 2016;
- 1289    84.    Seemann T. Prokka: Rapid prokaryotic genome annotation. *Bioinformatics.* 2014;
- 1290    85.    Hyatt D, Chen GL, LoCascio PF, Land ML, Larimer FW, Hauser LJ. Prodigal:  
1291            Prokaryotic gene recognition and translation initiation site identification. *BMC*  
1292            *Bioinformatics.* 2010;
- 1293    86.    James BT, Luczak BB, Girgis HZ. MeShClust: an intelligent tool for clustering  
1294            DNA sequences. *Nucleic Acids Res.* 2018;
- 1295    87.    Aramaki T, Blanc-Mathieu R, Endo H, Ohkubo K, Kanehisa M, Goto S, et al.  
1296            KofamKOALA: KEGG Ortholog assignment based on profile HMM and adaptive  
1297            score threshold. *Bioinformatics.* 2020;
- 1298    88.    Boratyn GM, Thierry-Mieg J, Thierry-Mieg D, Busby B, Madden TL. Magic-  
1299            BLAST, an accurate RNA-seq aligner for long and short reads. *BMC*  
1300            *Bioinformatics.* 2019;

- 1301 89. Dunivin TK, Yeh SY, Shade A. A global survey of arsenic-related genes in soil  
1302 microbiomes. *BMC Biol.* 2019;
- 1303 90. Parks DH, Imelfort M, Skennerton CT, Hugenholtz P, Tyson GW. CheckM:  
1304 Assessing the quality of microbial genomes recovered from isolates, single cells,  
1305 and metagenomes. *Genome Res.* 2015;
- 1306 91. Eren AM, Esen OC, Quince C, Vineis JH, Morrison HG, Sogin ML, et al. Anvi'o:  
1307 An advanced analysis and visualization platform for 'omics data. *PeerJ.* 2015;
- 1308 92. Olm MR, Brown CT, Brooks B, Banfield JF. DRep: A tool for fast and accurate  
1309 genomic comparisons that enables improved genome recovery from  
1310 metagenomes through de-replication. *ISME J.* 2017;
- 1311 93. Chaumeil P-A, Mussig AJ, Hugenholtz P, Parks DH. GTDB-Tk: a toolkit to classify  
1312 genomes with the Genome Taxonomy Database. *Bioinformatics.* 2019;
- 1313 94. Parks DH, Chuvochina M, Waite DW, Rinke C, Skarszewski A, Chaumeil PA, et  
1314 al. A standardized bacterial taxonomy based on genome phylogeny substantially  
1315 revises the tree of life. *Nat Biotechnol.* 2018;
- 1316 95. Stamatakis A. RAxML version 8: A tool for phylogenetic analysis and post-  
1317 analysis of large phylogenies. *Bioinformatics.* 2014;
- 1318 96. Letunic I, Bork P. Interactive Tree of Life (iTOL) v4: Recent updates and new  
1319 developments. *Nucleic Acids Res.* 2019;
- 1320 97. Schindelin J, Arganda-Carreras I, Frise E, Kaynig V, Longair M, Pietzsch T, et al.  
1321 Fiji: An open-source platform for biological-image analysis. *Nature Methods.*  
1322 2012.  
1323



1324

1325

1326

1327

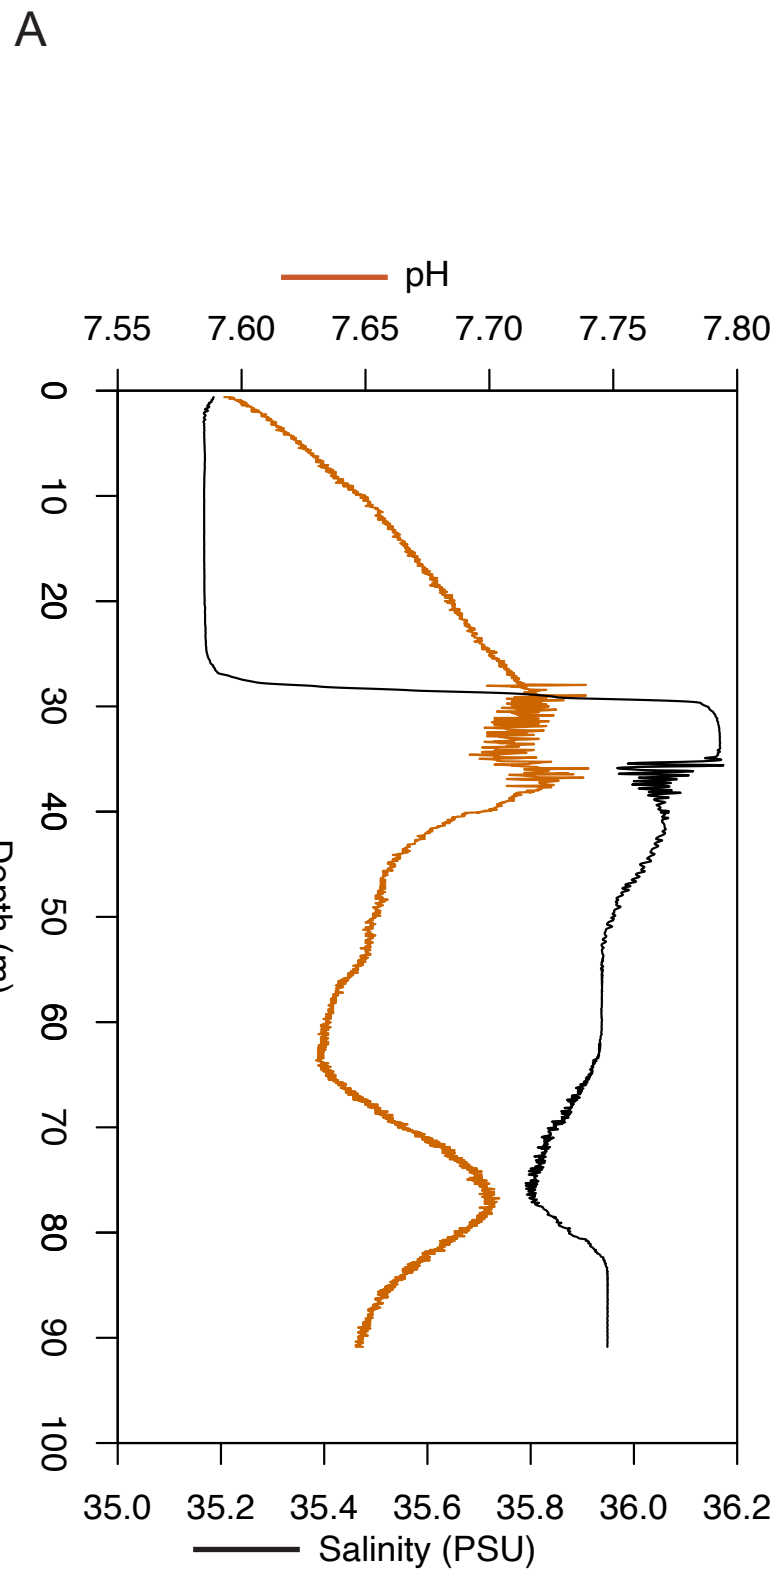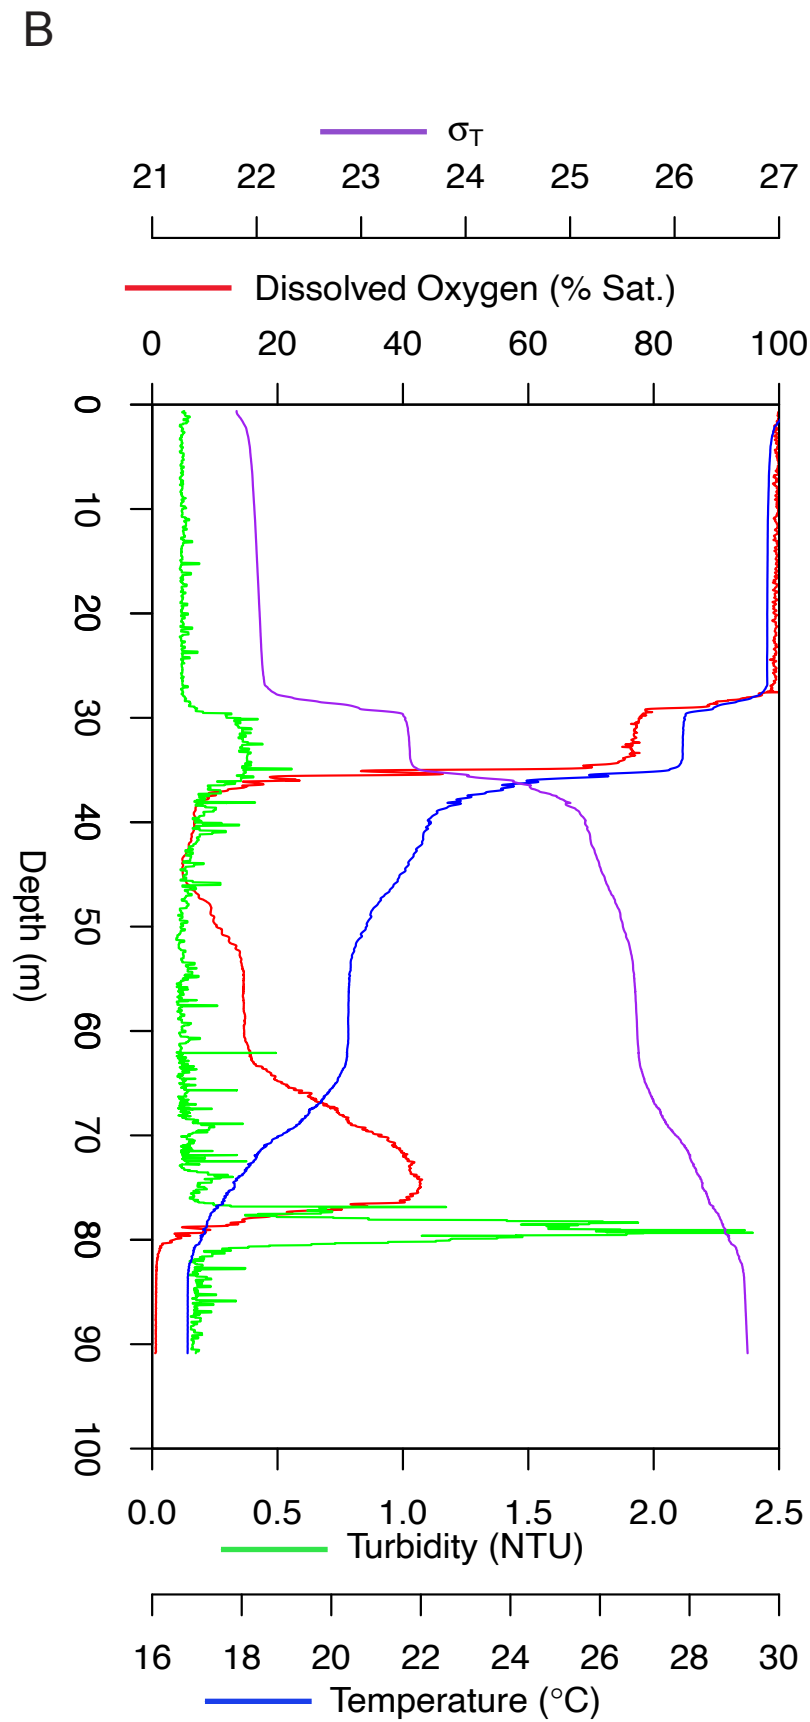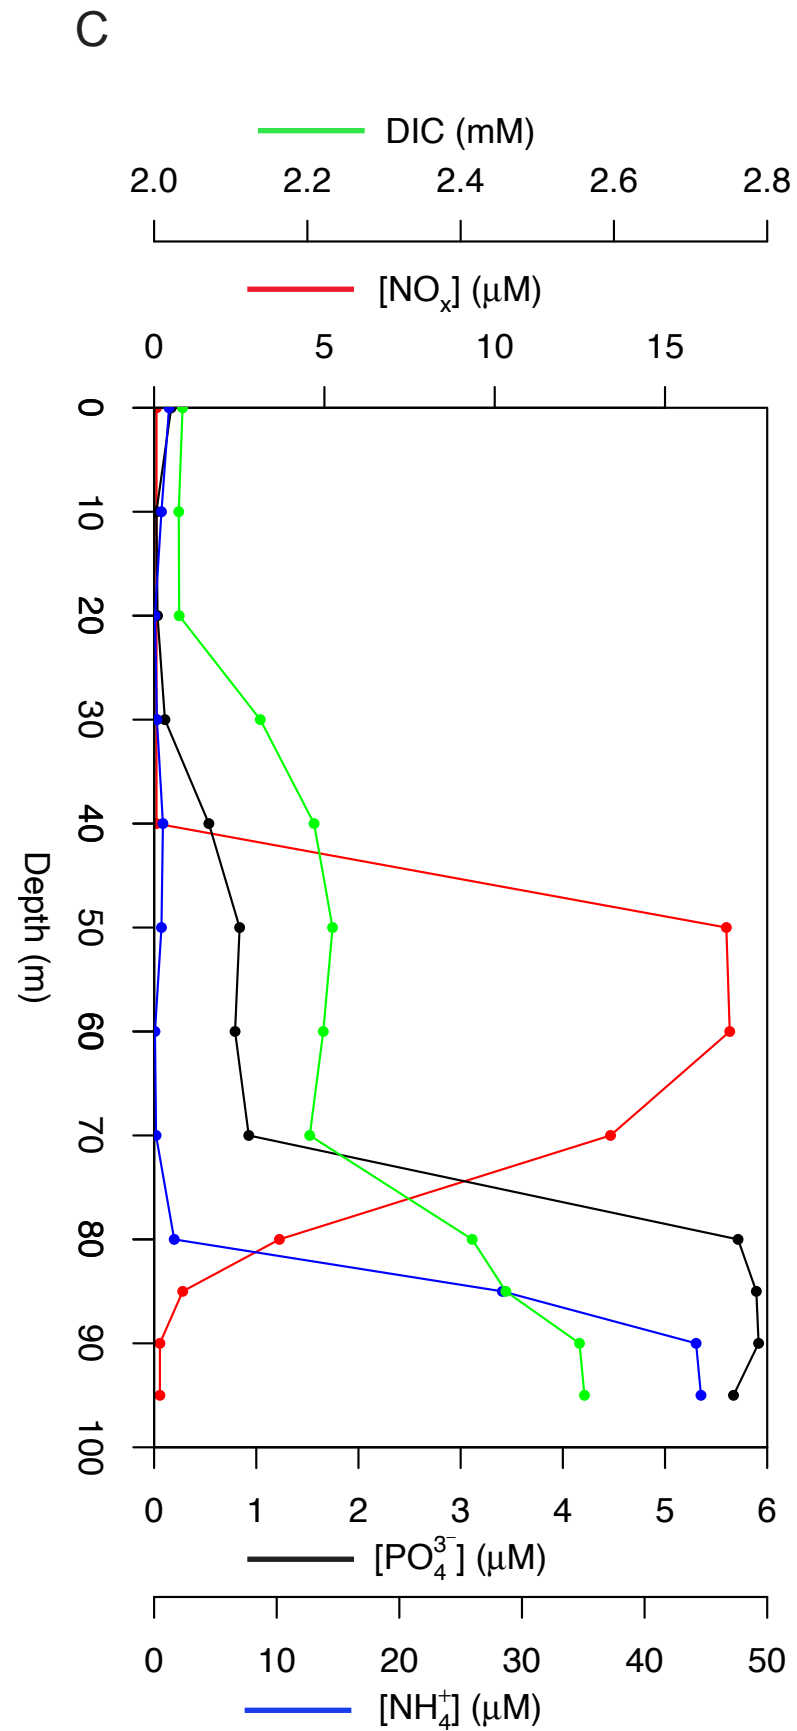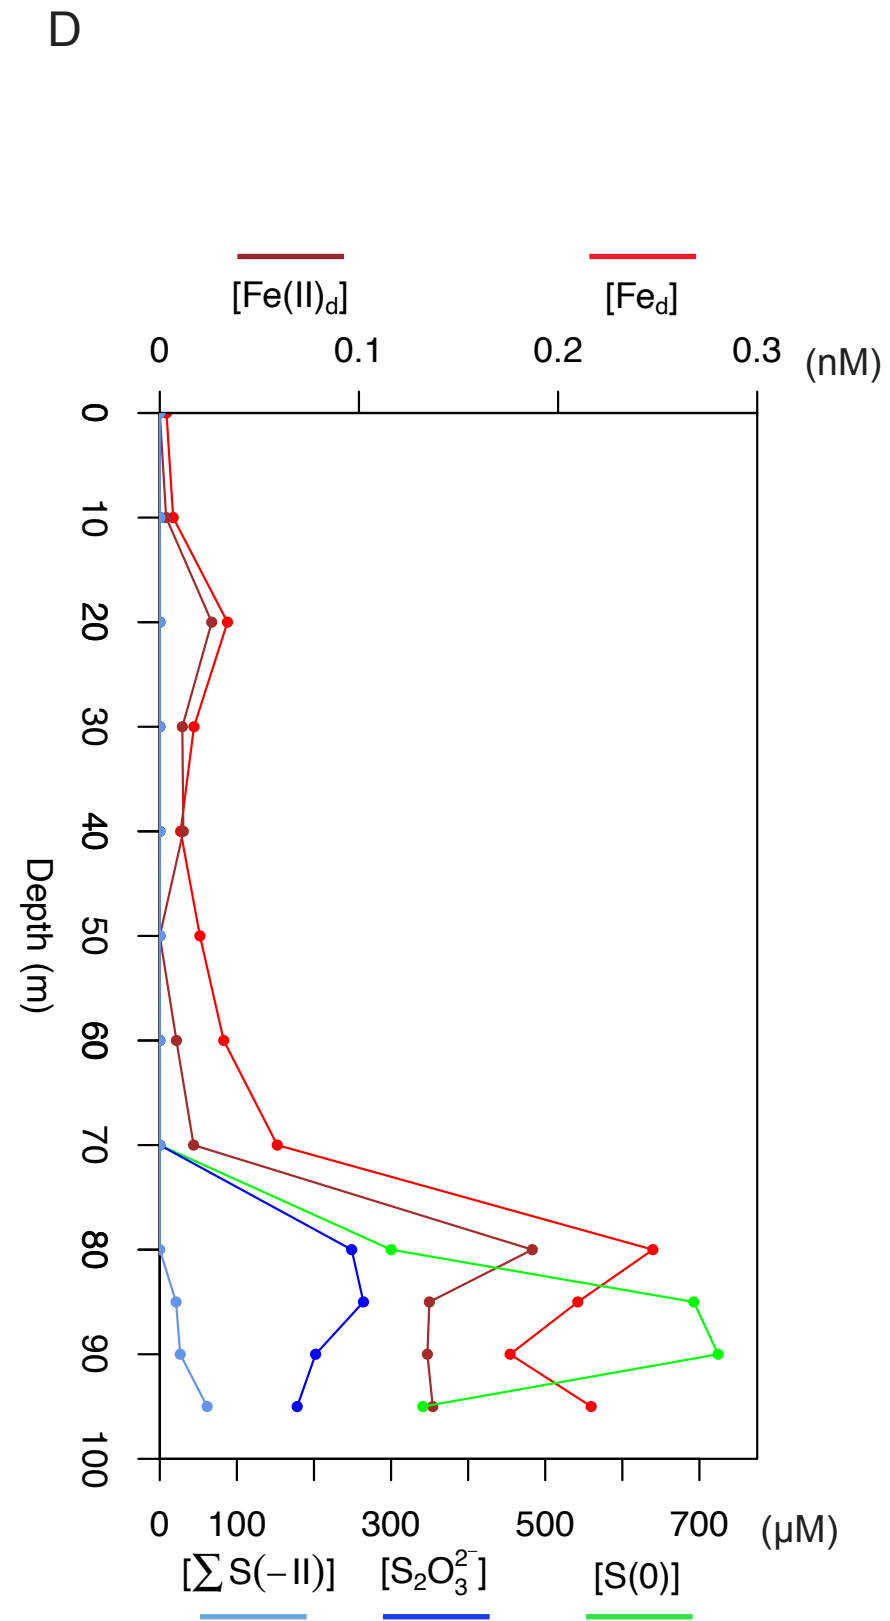

A.

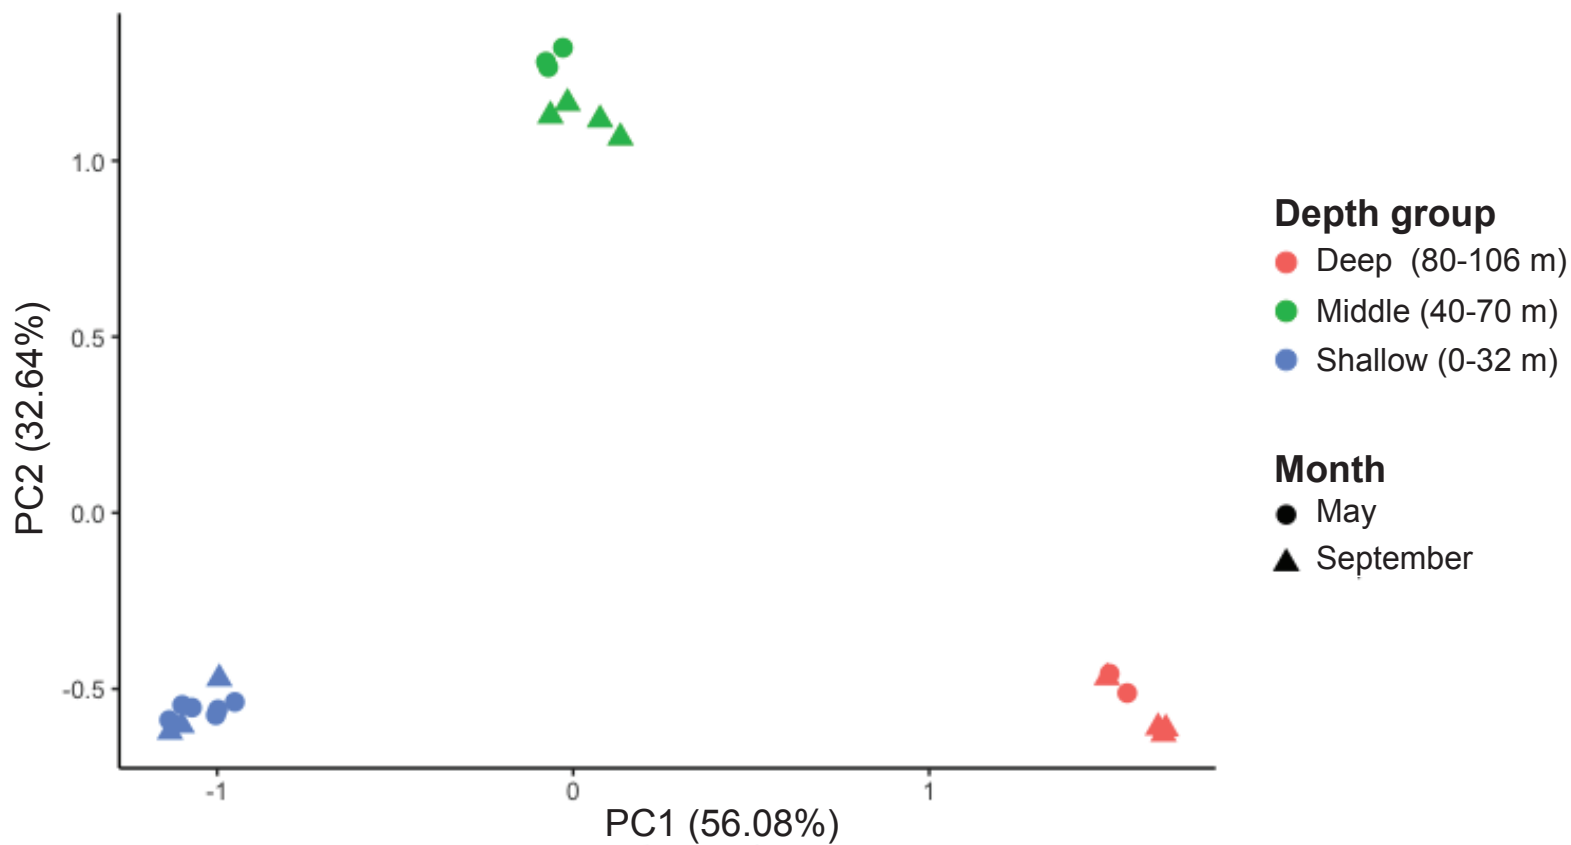

B.

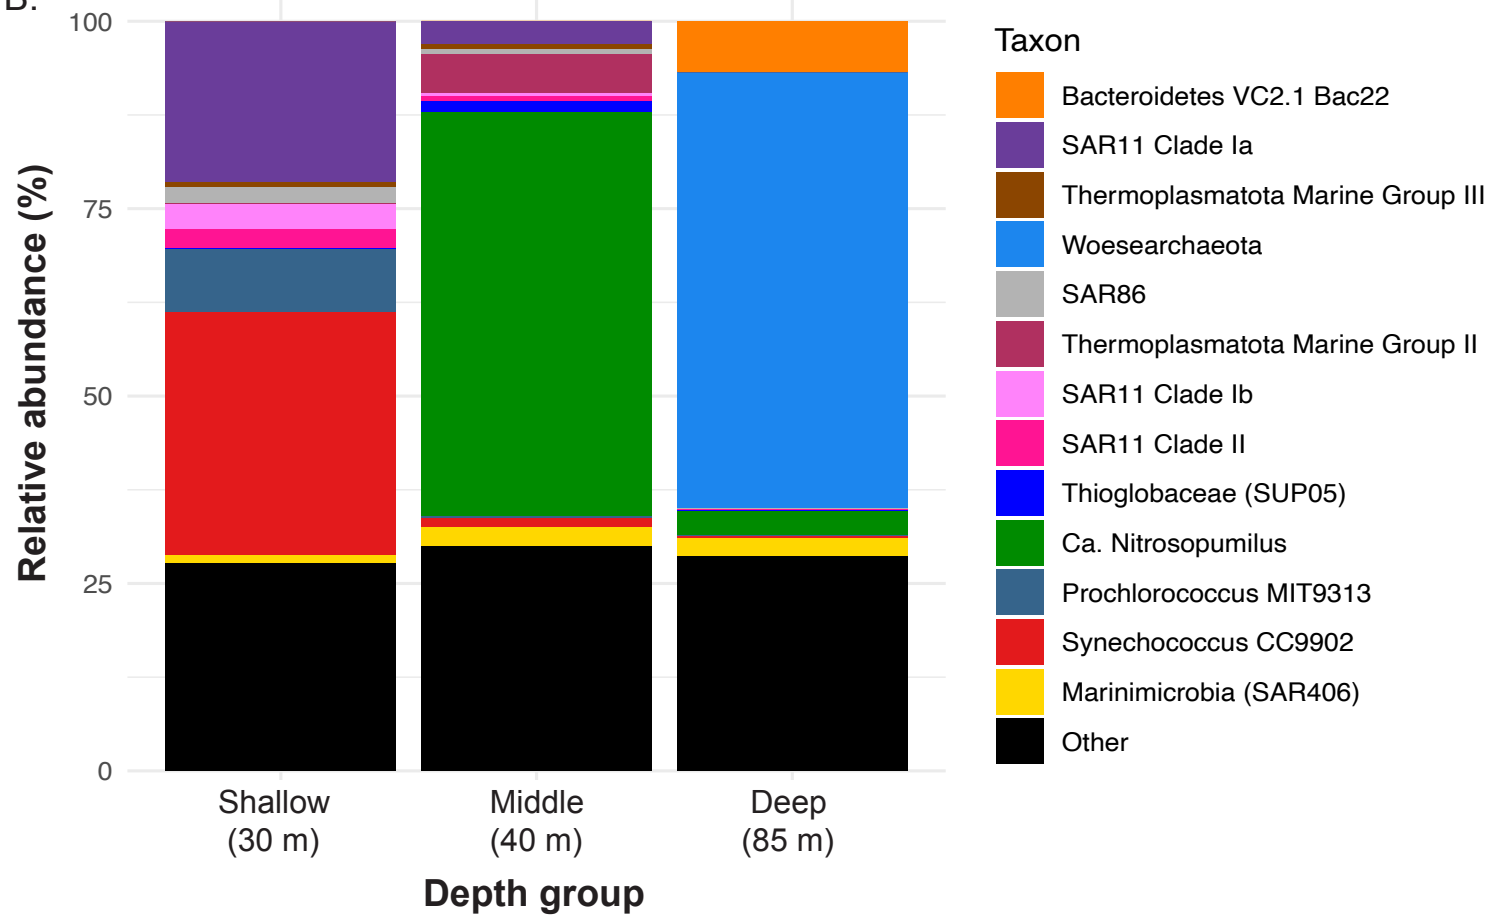

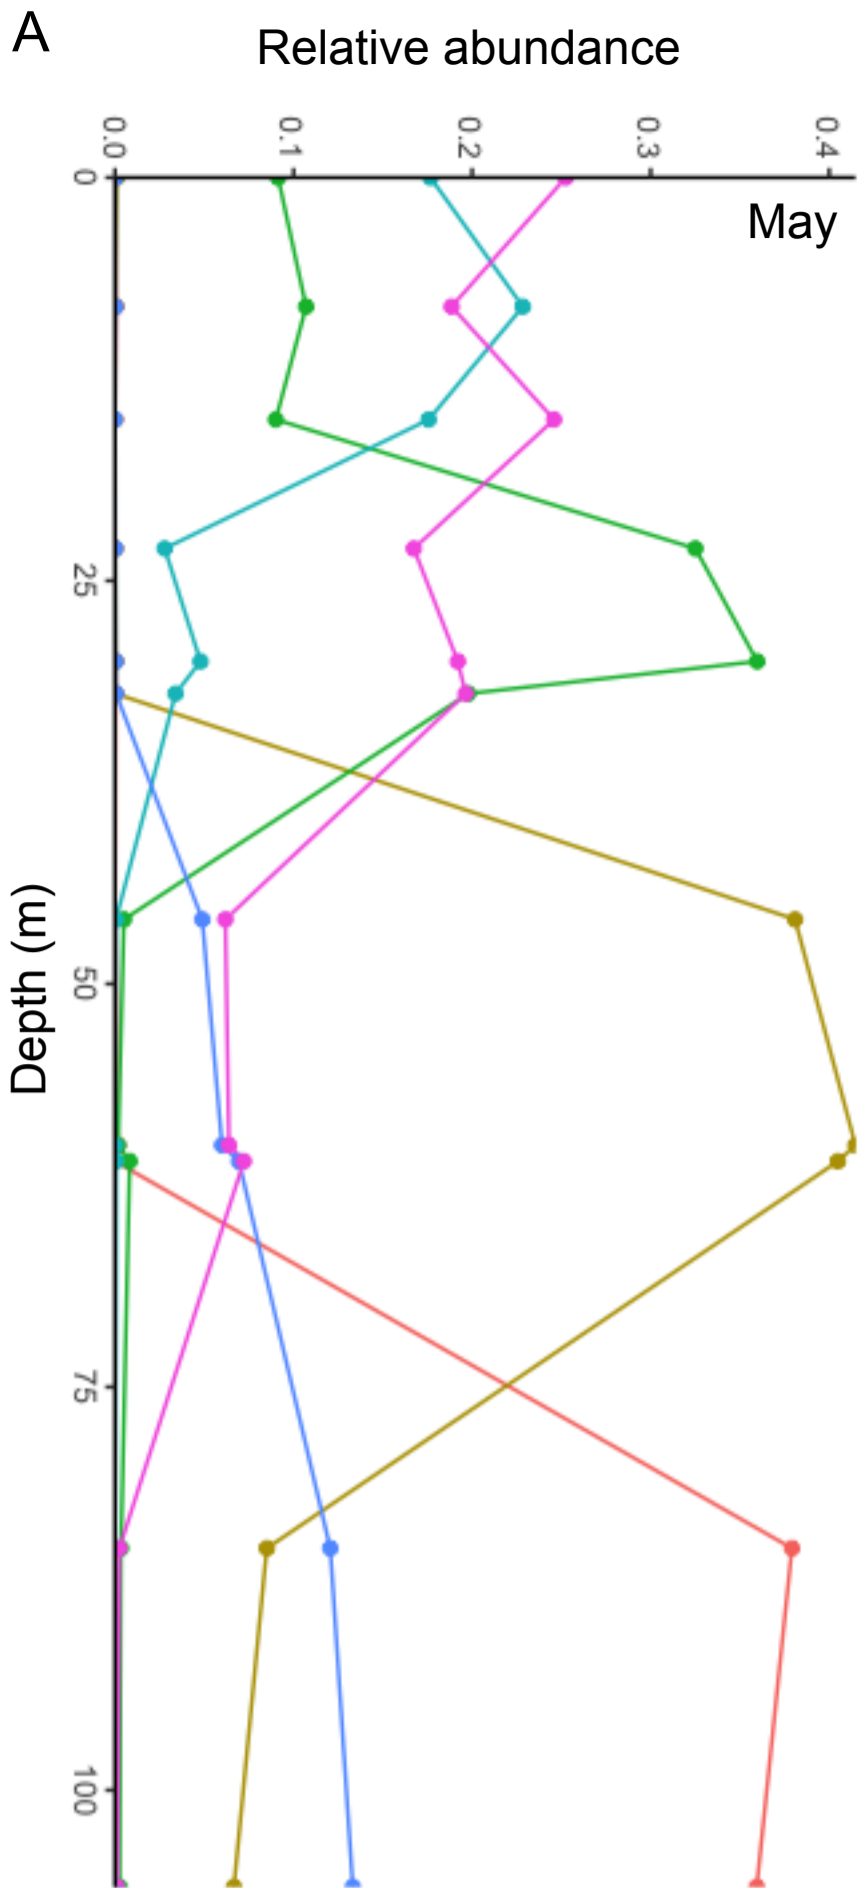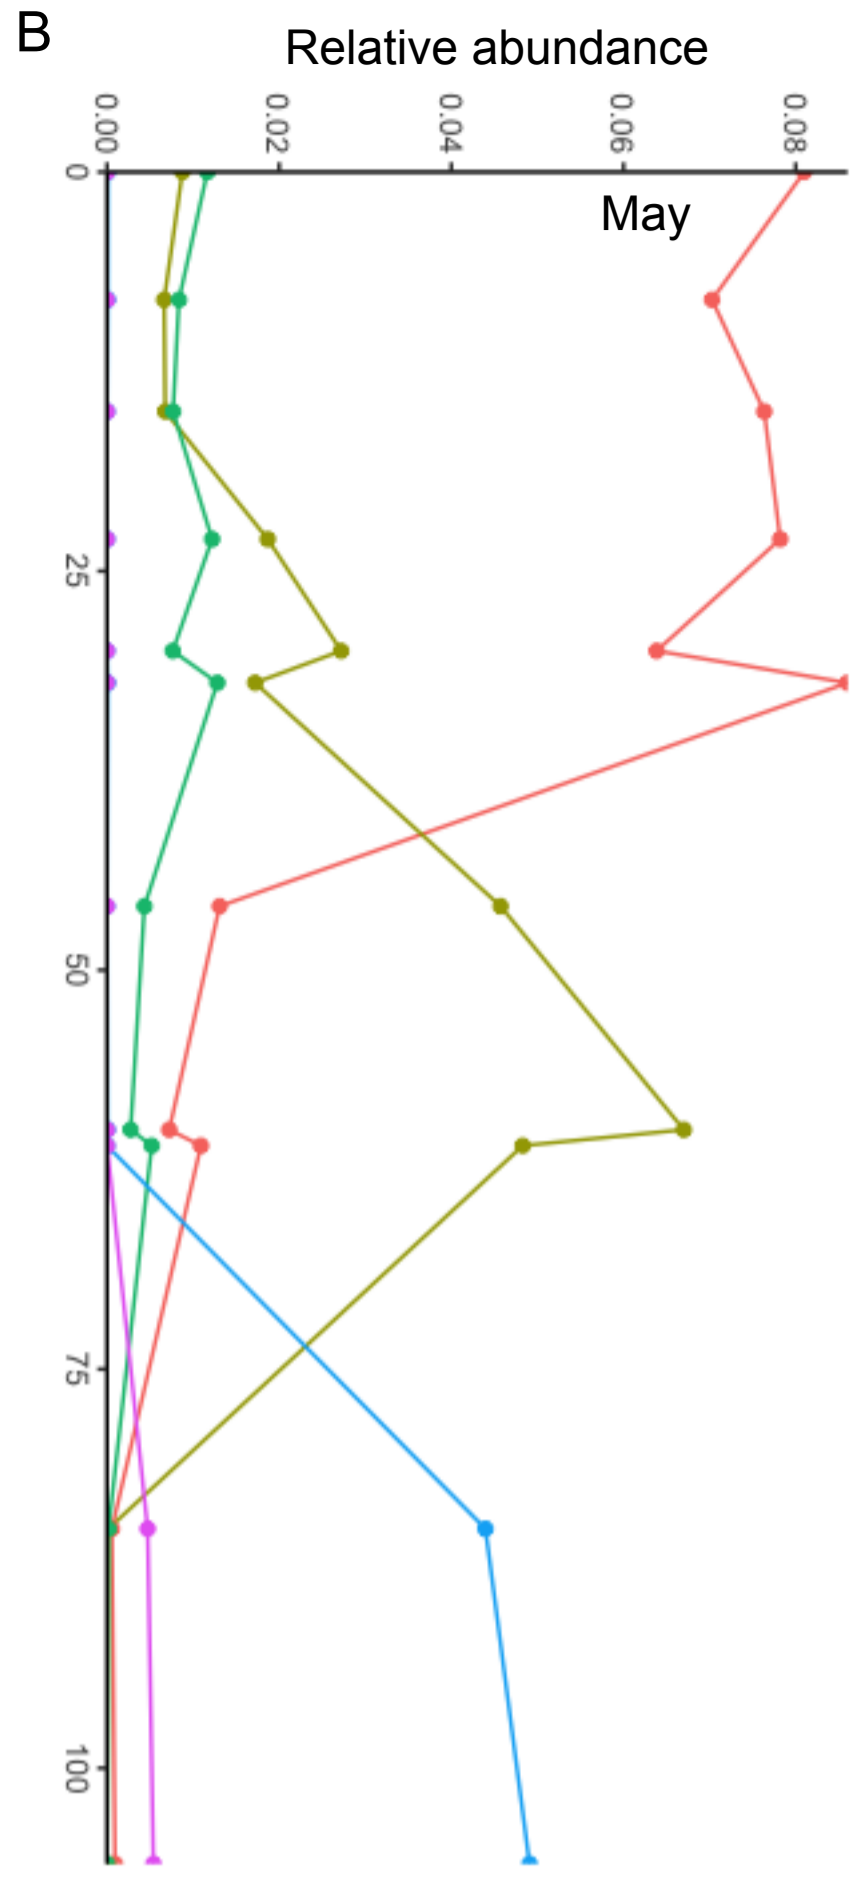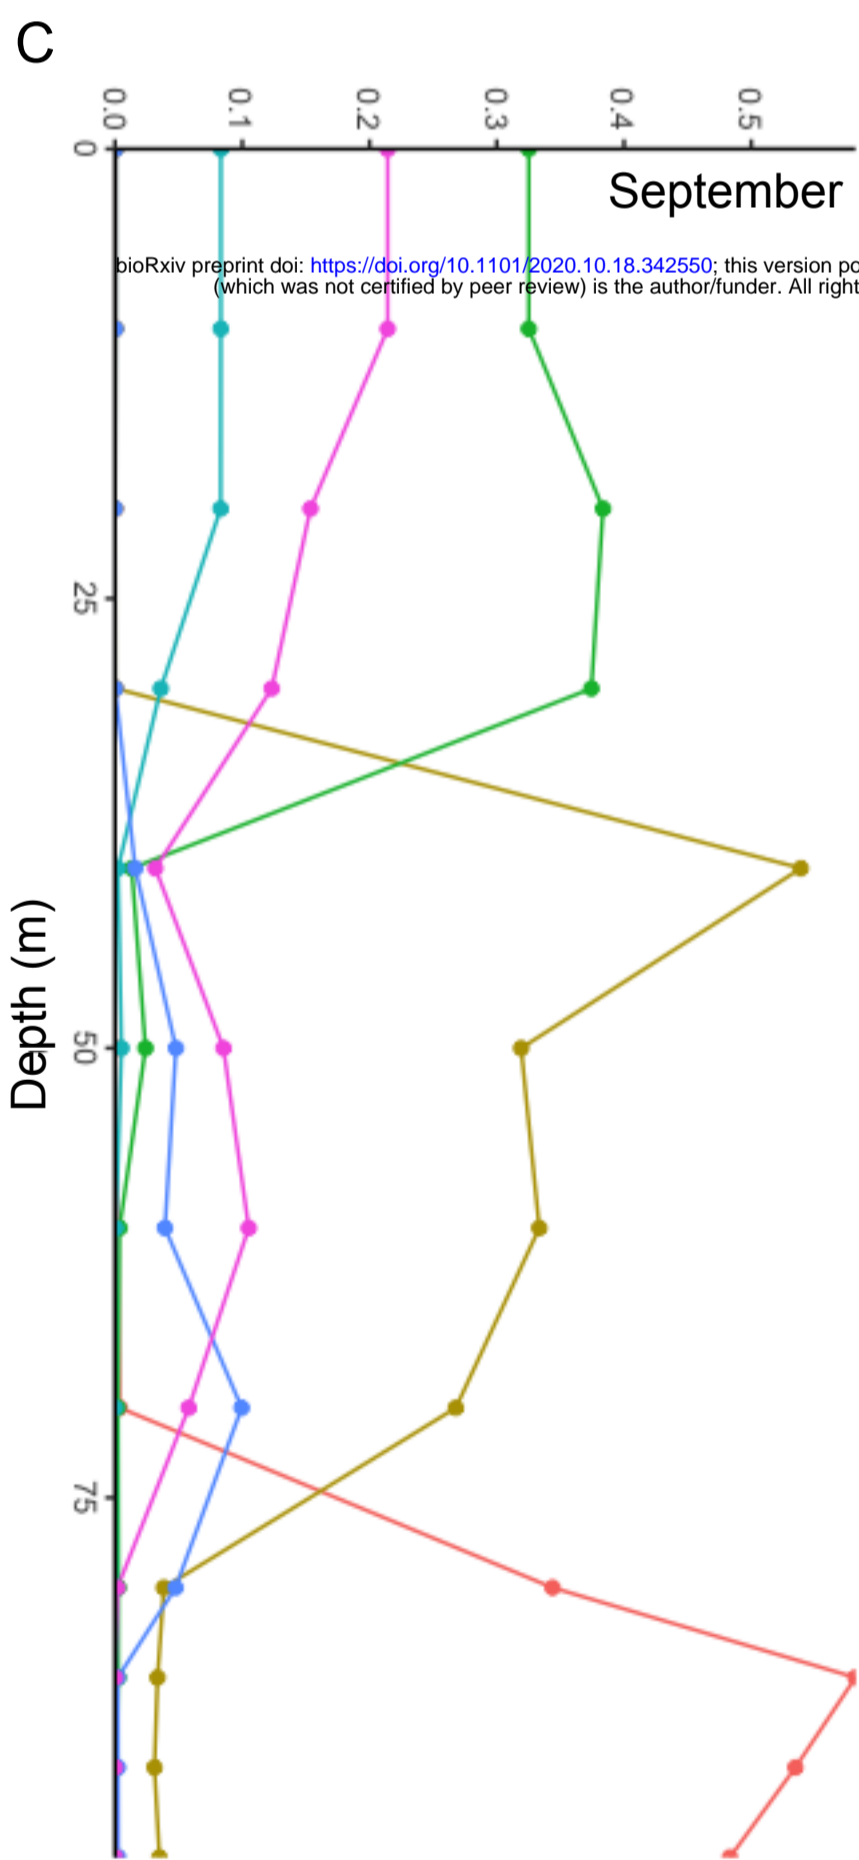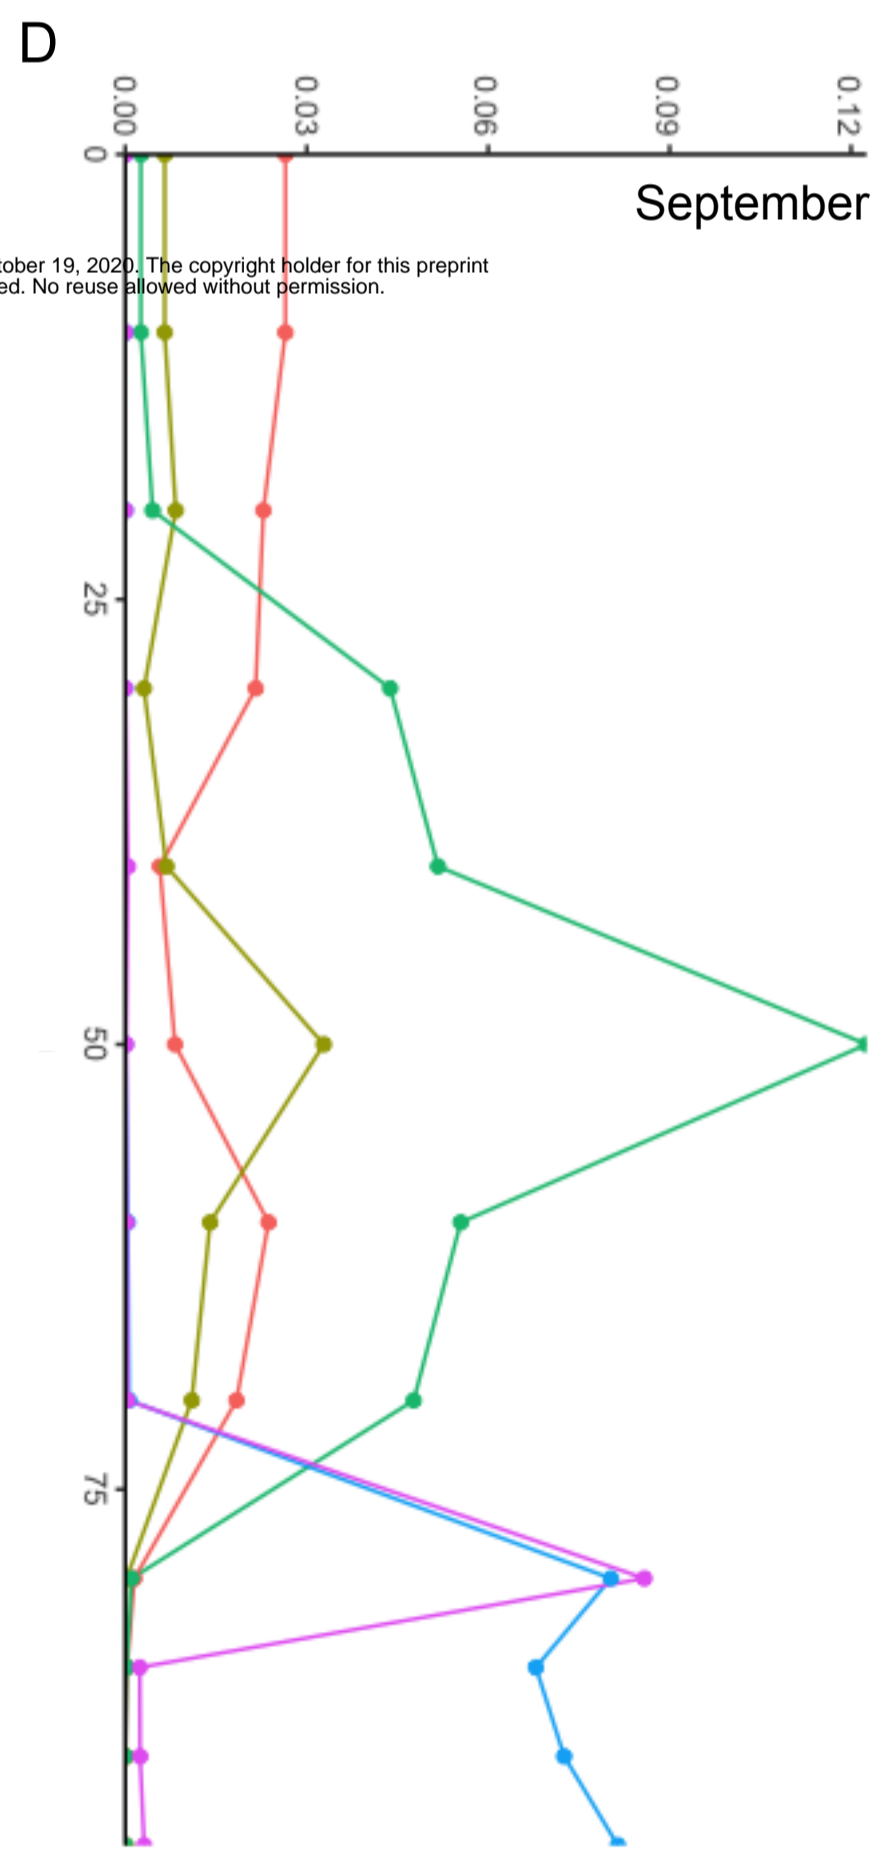

bioRxiv preprint doi: <https://doi.org/10.1101/2020.10.18.342550>; this version posted October 19, 2020. The copyright holder for this preprint (which was not certified by peer review) is the author/funder. All rights reserved. No reuse allowed without permission.

- Woesearchaeota
- *Ca. Nitrosopumilus*
- *Synechococcus* CC9902
- *Prochlorococcus* MIT9313
- Thioglobaceae (SUP05)
- SAR11 Clade Ia

- SAR11 Clade II
- Thermoplasmatota Marine Group III
- Thermoplasmatota Marine Group II
- Bacteroidota VC2.1 Bac22
- Arcobacter

Figure 4

Tree scale: 0.1

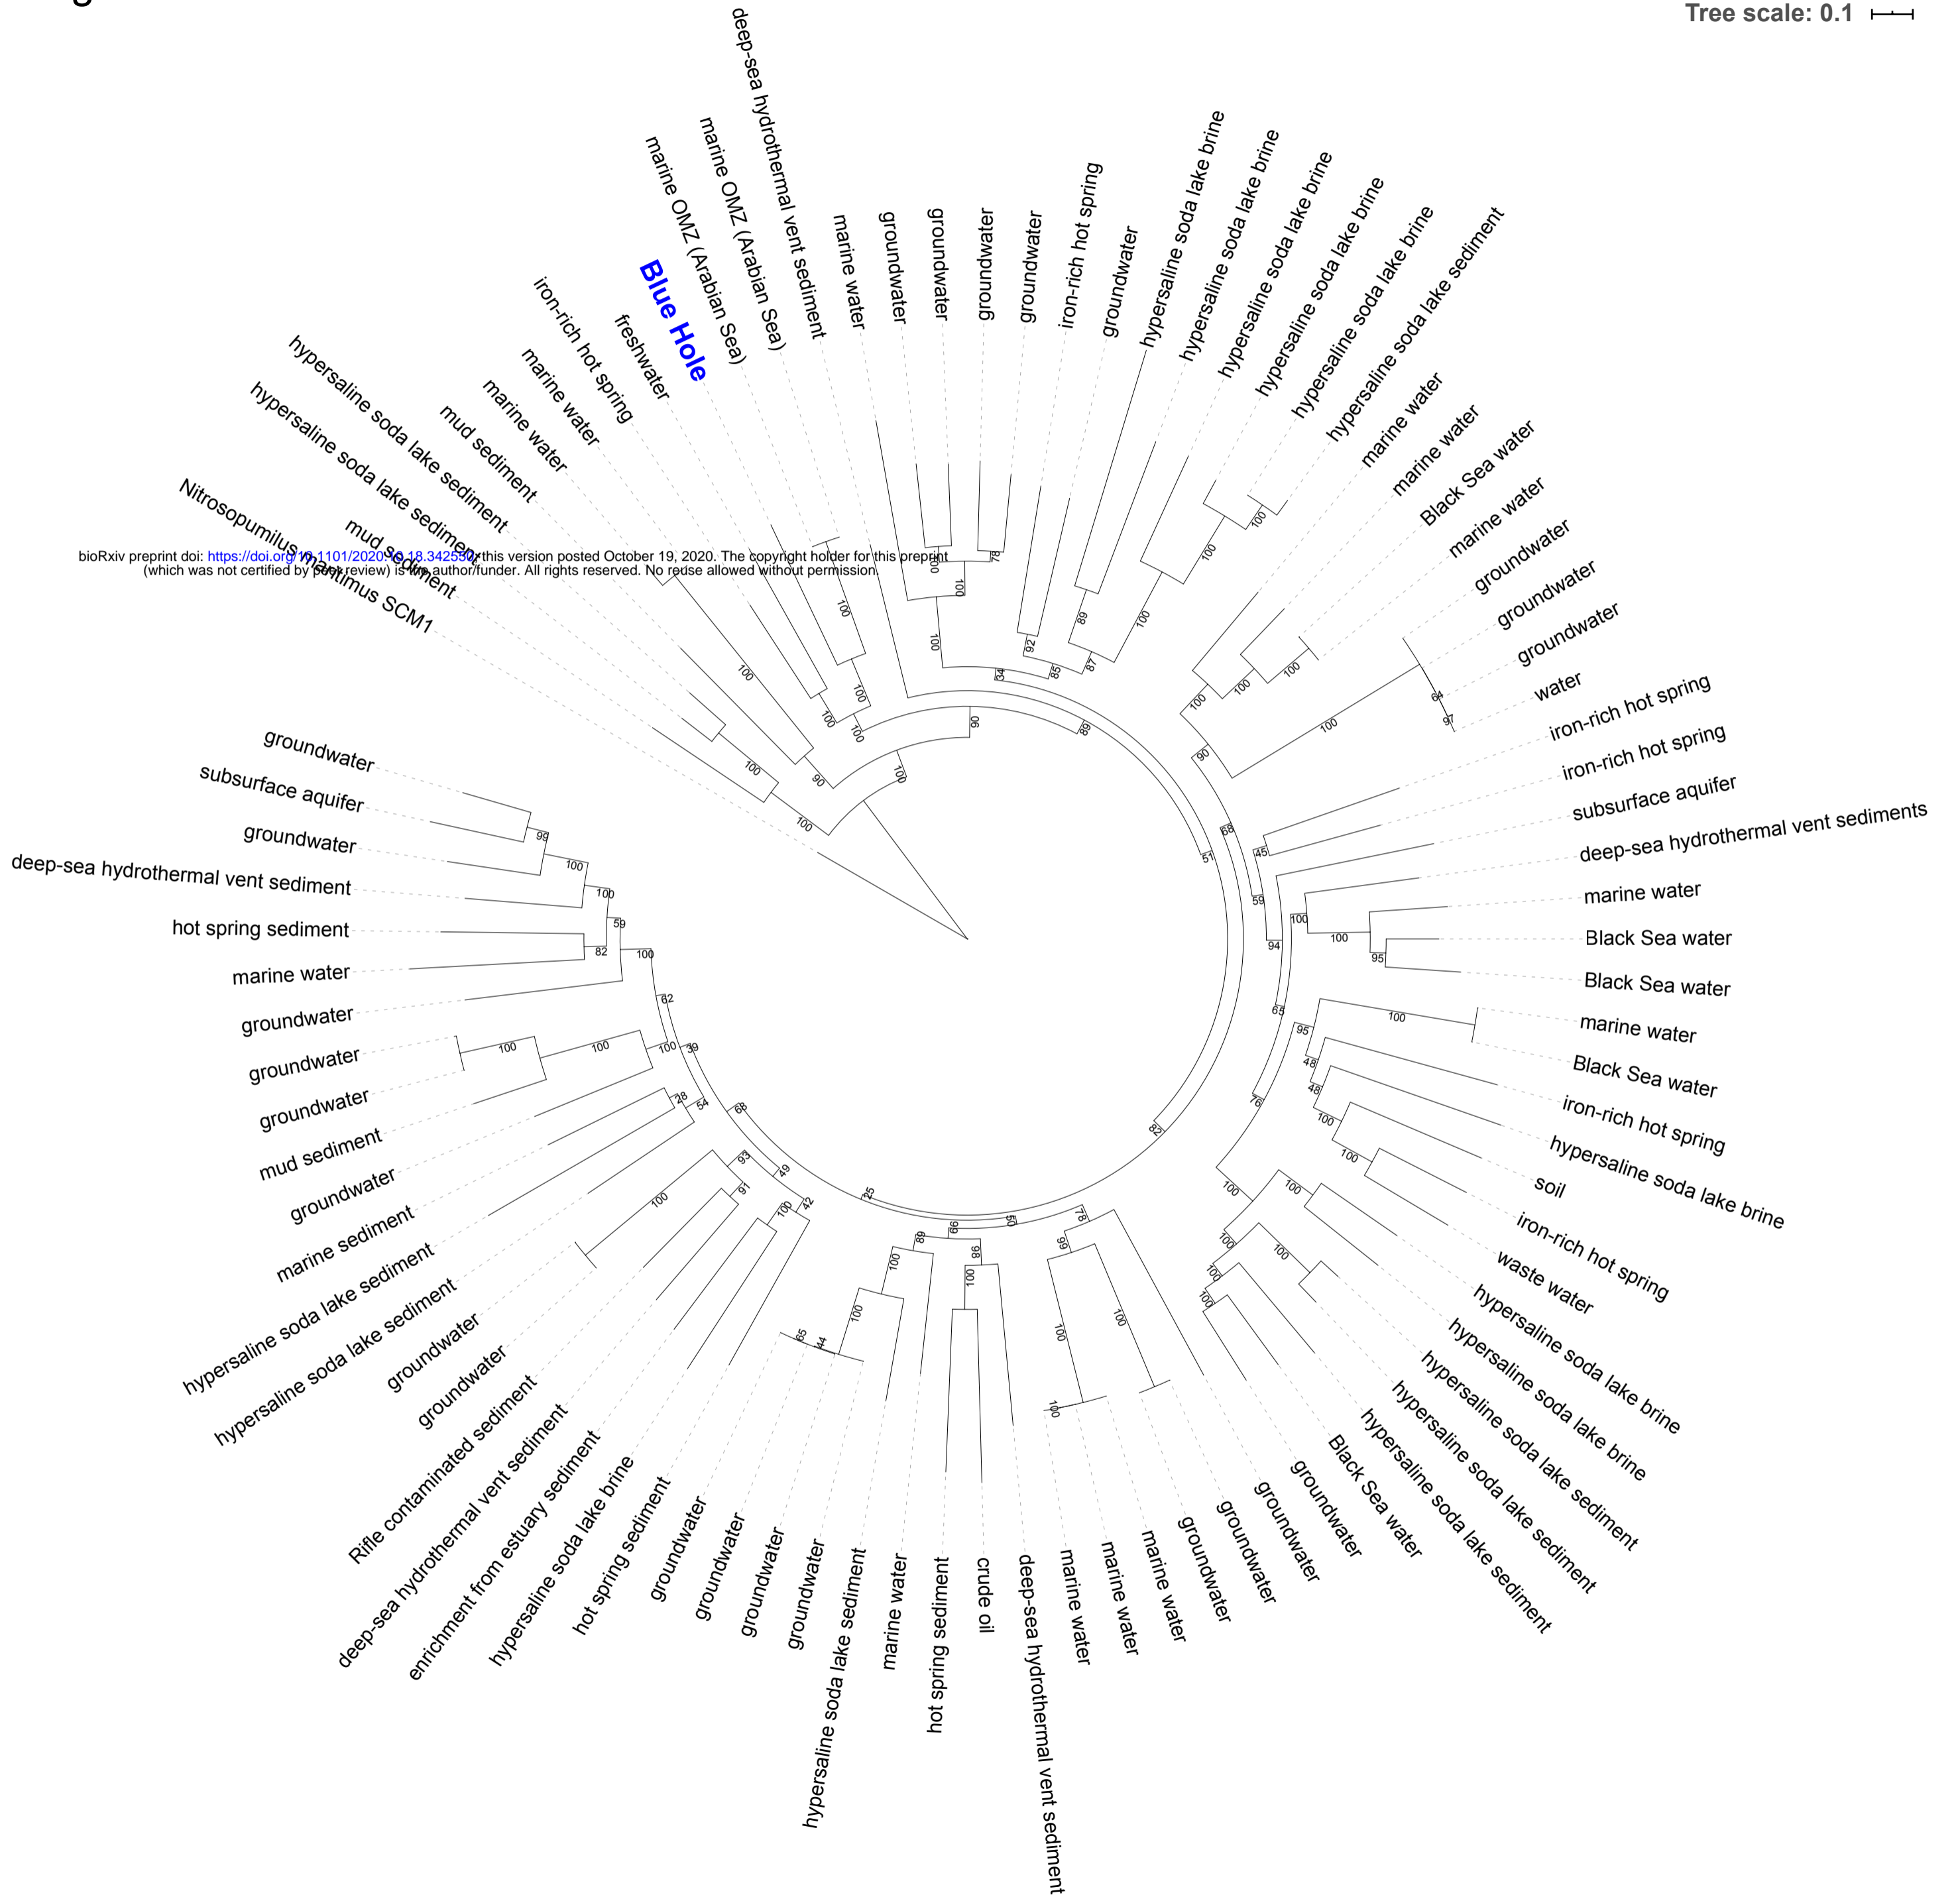



### A. Sulfur metabolism

### B. Nitrogen metabolism

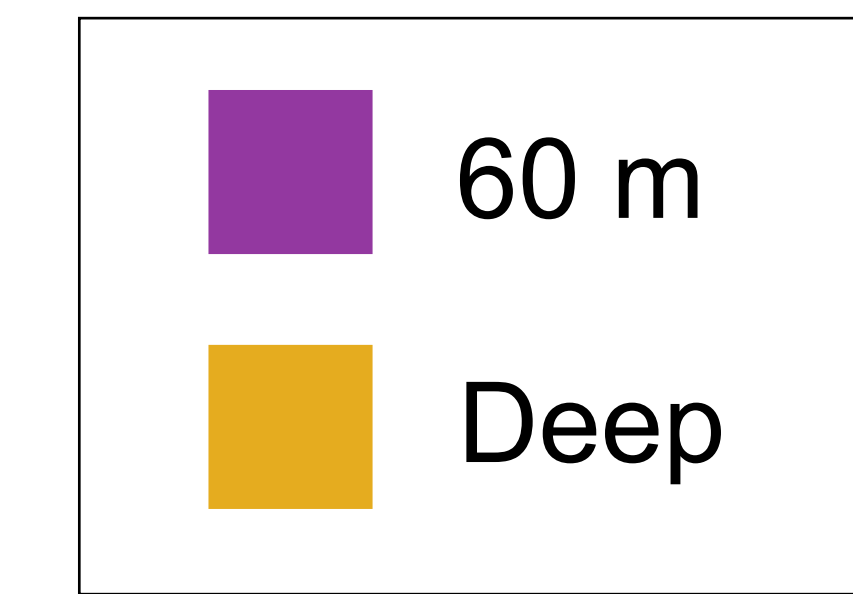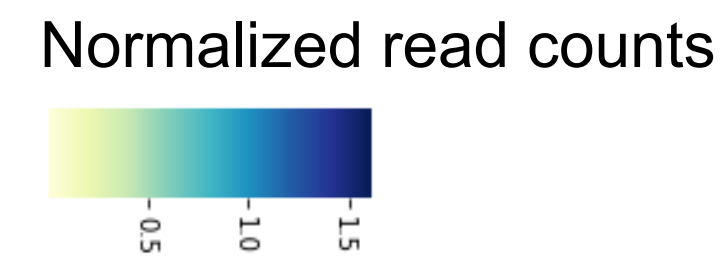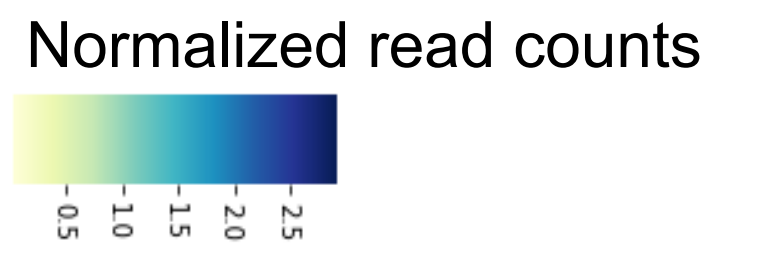

*hydB*: sulfur reductase  
*thsC*: thiosulfate reductase  
*ttrB*: tetrathionate reductase

*amoABC*: ammonia monooxygenase

*cysC*: adenylylsulfate kinase  
*soxCD* sulfane dehydrogenase  
*msmA*: methanesulfonate monooxygenase  
*dmdABCD*: dimethylsulfoniopropionate demethylation  
*metB*: cystathione gamma-synthase  
*tmoC*: toluene monooxygenase system  
unknown function

*hcp*: hydroxylamine reductase  
*nosZ*: nitrous oxide reductase  
*nrfA*: nitrite reductase  
GDH2: glutamate dehydrogenase  
*nirS*: nitrite reductase  
*nrfH*: cytochrome c nitrite reductase

*nmaA*: oligoribonuclease and PAP phosphatase  
*phsA/psrA*: thiosulfate reductase

*napAB*: nitrate reductase  
*norC*: nitric oxide reductase

*aprA*: adenylylsulfate reductase  
*sat*: sulfide adenylyltransferase  
*sqr*: sulfide:quinone oxidoreductase

*glnA*: glutamine synthetase  
*narK*: nitrite/nitrate transporter  
*narH*: nitrate reductase  
*narJ/narV*: nitrate reductase  
*gltD*: glutamate synthase

*dsrAB*: dissimilatory sulfite reductase

May 106 m    Sept 95 m    Sept 60 m    May 60 m

Sept 95 m    May 106 m    Sept 60 m    May 60 m

| <b>MAG</b> | <b>Depth (m)</b> | <b>Size (bp)</b> | <b>Domain</b> |
|------------|------------------|------------------|---------------|
| BH1        | 60               | 2,161,172        | Bacteria      |
| BH2        | 60               | 2,505,048        | Bacteria      |
| BH3        | 60               | 1,570,144        | Archaea       |
| BH4        | 60               | 1,401,763        | Archaea       |
| BH5        | 60               | 1,753,552        | Bacteria      |
| BH6        | 60               | 1,025,283        | Bacteria      |
| BH7        | 60               | 2,841,341        | Bacteria      |
| BH8        | 60               | 4,666,191        | Bacteria      |
| BH9        | 60               | 2,826,834        | Bacteria      |
| BH10       | 60               | 2,640,120        | Bacteria      |
| BH11       | 60               | 2,221,552        | Archaea       |
| BH12       | 60               | 1,562,194        | Archaea       |
| BH13       | 60               | 1,734,993        | Archaea       |
| BH14       | 60               | 2,785,000        | Bacteria      |
| BH15       | 60               | 2,081,625        | Archaea       |
| BH16       | 60               | 2,919,501        | Bacteria      |
| BH17       | 60               | 5,328,383        | Bacteria      |
| BH18       | 60               | 1,914,007        | Bacteria      |
| BH19       | 60               | 724,609          | Archaea       |
| BH20       | 95-106           | 1,243,845        | Bacteria      |
| BH21       | 95-106           | 678,935          | Archaea       |
| BH22       | 95-106           | 981,448          | Bacteria      |
| BH23       | 95-106           | 3,896,970        | Bacteria      |
| BH24       | 95-106           | 5,464,398        | Bacteria      |
| BH25       | 95-106           | 4,501,363        | Bacteria      |
| BH26       | 95-106           | 4,050,517        | Bacteria      |
| BH27       | 95-106           | 4,166,366        | Bacteria      |
| BH28       | 95-106           | 1,574,375        | Bacteria      |
| BH29       | 95-106           | 4,728,563        | Bacteria      |
| BH30       | 95-106           | 6,092,286        | Bacteria      |
| BH31       | 95               | 6,236,523        | Bacteria      |

| <b>Genome Taxonomy</b>                    | <b>Closest relative (ANI)</b>     |
|-------------------------------------------|-----------------------------------|
| TCS55 (Marinisomatota)                    | N/A                               |
| Porticoccaceae (Gammaproteobacteria)      | N/A                               |
| Marine Group III (Thermoplasmata)         | CG-Epi1 sp001875345 (94.4)        |
| Marine Group IIb-O1 (Thermoplasmata)      | MGIIb-O2 sp002686525 (96.9)       |
| Nitrosomonadaceae (Gammaproteobacteria)   | N/A                               |
| Puniceispirillaceae (Alphaproteobacteria) | N/A                               |
| Microtrichales (Actinobacteriota)         | UBA6944 sp002296525 (97.5)        |
| Microtrichales (Actinobacteriota)         | N/A                               |
| Methylomonadaceae (Gammaproteobacteria)   | OPU3-GD-OMZ sp001901525 (83)      |
| Gammaproteobacteria                       | N/A                               |
| Marine Group IIb-O1 (Thermoplasmata)      | MGIIb-O1 sp002496905 (99.7)       |
| Marine Group IIb-O1 (Thermoplasmata)      | MGIIb-O1 sp002502365 (96.2)       |
| Marine Group IIb-O1 (Thermoplasmata)      | MGIIb-O1 sp8684u (80.7)           |
| Nitrincolaceae (Gammaproteobacteria)      | N/A                               |
| Thalassoarchaeaceae (Thermoplasmata)      | N/A                               |
| Microtrichales (Actinobacteriota)         | N/A                               |
| Myxococcota                               | N/A                               |
| Phycisphaerales (Planctomycetota)         | N/A                               |
| Nitrosopumilus (Thaumarchaeota)           | Nitrosopumilus sp001541925 (94.5) |
| Thioglobaceae (Gammaproteobacteria)       | UBA2013 sp003489145 (82.2)        |
| Woesearchaeota                            | N/A                               |
| Patescibacteria                           | N/A                               |
| Bacteroidales (Bacteroidota)              | N/A                               |
| Rhodospirillales (Alphaproteobacteria)    | N/A                               |
| Bacteroidales (Bacteroidota)              | N/A                               |
| Marinisomatota                            | N/A                               |
| Marinisomatota                            | N/A                               |
| Patescibacteria                           | N/A                               |
| Marinisomatota                            | N/A                               |
| NaphS2 (Desulfobacterota)                 | N/A                               |
| Myxococcota                               | N/A                               |

| 16S rRNA gene SV taxonomy                          | SV frequ |               |
|----------------------------------------------------|----------|---------------|
|                                                    | May 60M  | September 60M |
| Marinimicrobia (SAR406 clade)                      | 2.3      | 4.7           |
| SAR92 clade (Porticocceae, Gammaproteobacteria)    | 1.6      | 0.2           |
| Marine Group II (Euryarchaeota)                    | 1.5      | 0.1           |
| Nitrosomonas (Gammaproteobacteria)                 | 0.7      | 0.4           |
| SAR86 (Gammaproteobacteria)                        | 1.7      | 1.7           |
| Marine Group II (Euryarchaeota)                    | 0        | 1.1           |
| Phycisphaeraceae (Planctomycetes)                  | 0        | 0.3           |
| Nitrosopumilus (Thaumarchaeota)                    | 34       | 26            |
| SUP05 cluster (Thioglobaceae, Gammaproteobacteria) | 0.08     | 0.8           |
| Woesearchaeia (Nanoarchaeota)                      | 0.1      | 0.2           |
| Ca. Uhrbacteria (Patescibacteria)*                 | 0        | 0.01          |
| Magnetospiraceae (Alphaproteobacteria)             | 0        | 0             |
| Bacteroidetes VC2.1 Bac22                          | 0        | 0             |
|                                                    | 0        | 0             |
|                                                    | 0        | 0             |
|                                                    | 0        | 0             |

**ency (%)**

| <b>May 106M</b> | <b>September 95M</b> |
|-----------------|----------------------|
| 0               | 0                    |
| 0               | 0                    |
| 0               | 0                    |
| 0               | 0                    |
| 0               | 0                    |
| 0               | 0                    |
| 0               | 0                    |
| 0               | 0                    |
| 3.2             | 2.5                  |
| 10              | 0.3                  |
| 35.6            | 44.6                 |
| 1               | 1.2                  |
| 1.8             | 0.5                  |
| 1.6             | 2.6                  |
| 0.4             | 0.4                  |
| 0.05            | 0.09                 |
| 0.2             | 0.2                  |

| MAG  | Taxonomy                                  | sulfate ↔ sulfite |       |      |      |      |
|------|-------------------------------------------|-------------------|-------|------|------|------|
|      |                                           | sat               | aprA  | aprB | dsrA | dsrB |
| BH1  | TCS55 (Marinisomatota)                    |                   |       |      |      |      |
| BH2  | Porticoccaceae (Gammaproteobacteria)      |                   |       |      |      |      |
| BH3  | Marine Group III (Thermoplasmatota)       |                   |       |      |      |      |
| BH4  | Marine Group IIb-O1 (Thermoplasmatota)    |                   |       |      |      |      |
| BH5  | Nitrosomonadaceae (Gammaproteobacteria)   |                   |       |      |      |      |
| BH6  | Puniceispirillaceae (Alphaproteobacteria) |                   |       |      |      |      |
| BH7  | Microtrichales (Actinobacteriota)         |                   |       |      |      |      |
| BH8  | Microtrichales (Actinobacteriota)         |                   |       |      |      |      |
| BH9  | Methylomonadaceae (Gammaproteobacteria)   | X                 |       |      |      |      |
| BH10 | Gammaproteobacteria                       | X                 |       |      | X(2) | X(2) |
| BH11 | Marine Group IIb-O1 (Thermoplasmatota)    |                   |       |      |      |      |
| BH12 | Marine Group IIb-O1 (Thermoplasmatota)    |                   |       |      |      |      |
| BH13 | Marine Group IIb-O1 (Thermoplasmatota)    |                   |       |      |      |      |
| BH14 | Nitrincolaceae (Gammaproteobacteria)      |                   |       |      |      |      |
| BH15 | Thalassoarchaeaceae (Thermoplasmatota)    |                   |       |      |      |      |
| BH16 | Microtrichales (Actinobacteriota)         |                   |       |      |      |      |
| BH17 | Myxococcota                               |                   |       |      |      |      |
| BH18 | Phycisphaerales (Planctomycetota)         | X                 |       |      |      |      |
| BH19 | Nitrosopumilus (Thaumarchaeota)           | X                 |       |      |      |      |
| BH20 | Thioglobaceae (Gammaproteobacteria)       | X                 | X     | X    | X    | X    |
| BH21 | Woesearchaeota                            |                   |       |      |      |      |
| BH22 | Patescibacteria                           |                   |       |      |      |      |
| BH23 | Bacteroidales (Bacteroidota)              |                   |       |      |      |      |
| BH24 | Rhodospirillales (Alphaproteobacteria)    | X                 | X     | X    | X    | X    |
| BH25 | Bacteroidales (Bacteroidota)              | X                 |       |      |      |      |
| BH26 | Marinisomatota                            |                   |       |      |      |      |
| BH27 | Marinisomatota                            |                   |       |      |      |      |
| BH28 | Patescibacteria                           |                   |       |      |      |      |
| BH29 | Marinisomatota                            |                   |       |      |      |      |
| BH30 | NaphS2 (Desulfobacterota)                 | X                 | X (2) | X    | X    | X    |
| BH31 | Myxococcota                               |                   |       |      |      |      |





|      |       | ammonia monooxygenase | methane monooxygenase | NO <sub>3</sub> → NO <sub>2</sub> |      |      |
|------|-------|-----------------------|-----------------------|-----------------------------------|------|------|
| soxZ | sqr   | amoAB                 | pmoAB                 | narG                              | narH | napA |
|      | X     |                       |                       | X                                 | X    |      |
| X    | X     |                       |                       |                                   |      |      |
| X    | X     |                       | X (2)                 | X                                 | X    |      |
|      | X     |                       |                       | X                                 | X    |      |
|      | X     | X                     |                       | X                                 | X    | X    |
| X    | X     |                       |                       |                                   |      | X    |
|      | X     |                       |                       | X                                 | X    |      |
|      | X     |                       |                       |                                   |      | X    |
|      | X (2) |                       |                       |                                   |      |      |
|      | X     |                       |                       |                                   |      |      |
|      | X     |                       |                       |                                   |      |      |

| napB | NO <sub>2</sub> → NO |       | NO → N <sub>2</sub> O |      | N <sub>2</sub> O → N <sub>2</sub> | arsenite oxidase | arsenate reductase |
|------|----------------------|-------|-----------------------|------|-----------------------------------|------------------|--------------------|
|      | nirK                 | nirS  | norCB (P)             | norQ | nosZ                              | aioAB            | arrA               |
|      | X                    |       |                       |      |                                   |                  |                    |
|      | X                    |       |                       |      |                                   |                  |                    |
|      |                      | X (2) |                       | X    |                                   |                  |                    |
|      |                      | X     |                       |      |                                   |                  |                    |
|      | X                    |       |                       | X    |                                   | X                |                    |
| X    | X                    |       | X                     | X    |                                   |                  |                    |
| X    |                      | X (2) |                       | X    | X                                 | X (2)            |                    |
| X    |                      |       |                       |      | X                                 |                  |                    |
|      |                      |       |                       | X    |                                   |                  | X                  |
|      |                      |       |                       | X    |                                   |                  |                    |

| arsenic resistance |       |
|--------------------|-------|
| arsC               | arsM  |
| X                  |       |
| X                  |       |
|                    |       |
| X                  |       |
|                    |       |
| X                  | X     |
|                    | X     |
| X                  | X     |
| X                  |       |
| X                  |       |
| X                  |       |
| X                  | w     |
|                    |       |
| X                  |       |
| X                  |       |
|                    | X (2) |
|                    |       |
| X                  | X     |
| X                  |       |
| X                  | X     |
| X                  | X     |
| X                  |       |
| X                  |       |
| X                  |       |
| X                  |       |
| X                  |       |
| X                  | X (2) |
| X                  | X (6) |
